# Supplementary material
Source: PubMed Central journal article supplement (PMC2954640)
Supplement: me.2010-0216_1.pdf [file me.2010-0216_1.pdf]

| PMID     | NR  | CoR | Li   | Chart_category   | Source                                                | Taxon | GEO |
|----------|-----|-----|------|------------------|-------------------------------------------------------|-------|-----|
| 10766166 | 1B1 |     | li25 | Cardiovascular   | Blood, myeloid leukemia cells, TF1-PR                 | 9606  |     |
| 10813842 |     |     | li25 | Stem cells       | Stem cells, embryonic D3 E                            | 10090 |     |
| 10873663 |     |     | li27 | Breast           | Mammary gland, mammary carcinoma cells, MCF-7         | 9606  |     |
| 10894146 |     |     | li48 | Liver            | Liver                                                 | 10090 |     |
| 10965925 |     |     | li45 | Endometrium      | Endometrium, stromal cells                            | 9606  |     |
| 11328825 |     | C97 |      | Liver            | Liver                                                 | 10090 |     |
| 11397807 |     |     | 909  | Gastrointestinal | Intestine, colon carcinoma cells, MOSER S             | 9606  |     |
| 11397807 |     |     | li6  | Gastrointestinal | Intestine, colon carcinoma cells, MOSER S             | 9606  |     |
| 11467847 |     |     | li25 |                  | Embryonal carcinoma cells, Tera-2                     | 9606  |     |
| 11501497 |     |     | li25 | CNS              | CNS, neuroblastoma cells, RTBM1                       | 9606  |     |
| 11520125 |     |     | li25 | Cardiovascular   | Endothelium, endothelial cells, umbilical vein, HUVEC | 9606  |     |
| 11532977 | 1C1 |     |      | Liver            | Liver                                                 | 10090 |     |
| 11717311 | 3C3 |     | li45 | Breast           | Mammary gland, mammary carcinoma cells, T47D          | 9606  |     |
| 11719706 |     |     |      | Testis           | Testis, fetal                                         | 10116 |     |
| 11751623 |     |     | li36 | Immune           | Immune system, spleen                                 | 10090 |     |
| 11764000 | 1C1 |     | li38 | Liver            | Liver                                                 | 10090 |     |
| 11772937 |     |     | li33 | Cardiovascular   | Blood, peripheral mononuclear cells                   | 9606  |     |
| 11796486 |     |     | li48 | CNS              | CNS, pituitary, thyrotrope cells, TtT-97              | 10090 |     |
| 11798191 |     |     | 1029 | Liver            | Liver                                                 | 10090 |     |
| 11798191 |     |     | li38 | Liver            | Liver                                                 | 10090 |     |
| 11834723 | 2A1 |     |      | Liver            | Liver, hepatoma cells, HuH-7                          | 9606  |     |
| 11847429 |     |     | li25 | CNS              | CNS, neuroblastoma cells, SH-SY5Y                     | 9606  |     |
| 11888893 |     |     | li36 | Breast           | Mammary gland, mammary carcinoma cells, MCF-7         | 9606  |     |
| 11888893 |     |     | li9  | Breast           | Mammary gland, mammary carcinoma cells, MCF-7         | 9606  |     |
| 11960622 |     |     | li27 | Bone             | Bone, osteoblast cells, ROS 17/2.8                    | 10116 |     |
| 11981038 | 1C3 |     | li6  | Fat              | Adipose tissue, preadipocytes, 3T3-L1                 | 10090 |     |
| 12011481 |     |     | 1097 | Liver            | Liver                                                 | 10116 |     |
| 12011481 |     |     | li38 | Liver            | Liver                                                 | 10116 |     |
| 12032151 |     |     | li24 | Cardiovascular   | Blood, peritoneal macrophages                         | 10090 |     |
| 12047351 |     |     | li36 | Uterus           | Uterus                                                | 10090 |     |
| 12053578 |     |     | li52 | Cardiovascular   | Heart                                                 | 10090 |     |
| 12054511 |     |     | li33 | Cardiovascular   | Blood, leukemia, pre-B 697 cells                      | 9606  |     |
| 12075115 |     |     | li25 | Others           | Head and neck squamous carcinoma cells, SCC4          | 9606  |     |
| 12075121 |     |     | 1013 | Ovary            | Ovary, fetal                                          | 10116 |     |
| 12075121 |     |     | 1013 | Uterus           | Uterus, fetal                                         | 10116 |     |
| 12075121 |     |     | 1071 | Ovary            | Ovary, fetal                                          | 10116 |     |
| 12075121 |     |     | 1071 | Uterus           | Uterus, fetal                                         | 10116 |     |
| 12124319 |     |     | li43 | Prostate         | Prostate, prostatic carcinoma cells, LNCaP            | 9606  |     |
| 12151626 |     |     | 805  | Liver            | Liver                                                 | 10090 |     |
| 12151626 | 1C1 |     |      | Liver            | Liver                                                 | 10090 |     |
| 12170760 |     |     | li25 | Breast           | Mammary gland, mammary carcinoma cells, MCF-7         | 9606  |     |

|          |     |      |                |                                                       |       |         |
|----------|-----|------|----------------|-------------------------------------------------------|-------|---------|
| 12176656 | 3A1 | li36 | Bone           | Bone                                                  | 10090 |         |
| 12176656 | 3A2 | li36 | Bone           | Bone                                                  | 10090 |         |
| 12177783 |     | 803  | Breast         | Mammary gland, mammary carcinoma cells, MDA-MB-321    | 9606  |         |
| 12177783 |     | 891  | Breast         | Mammary gland, mammary carcinoma cells, MDA-MB-321    | 9606  |         |
| 12177783 |     | 905  | Breast         | Mammary gland, mammary carcinoma cells, MDA-MB-321    | 9606  |         |
| 12177783 |     | li36 | Breast         | Mammary gland, mammary carcinoma cells, MDA-MB-321    | 9606  |         |
| 12177783 |     | li47 | Breast         | Mammary gland, mammary carcinoma cells, MDA-MB-321    | 9606  |         |
| 12177783 |     | li56 | Breast         | Mammary gland, mammary carcinoma cells, MDA-MB-321    | 9606  |         |
| 12177783 |     | li9  | Breast         | Mammary gland, mammary carcinoma cells, MDA-MB-321    | 9606  |         |
| 12184806 |     | li40 | Prostate       | Prostate, prostatic carcinoma cells, LNCaP            | 9606  | GSE3451 |
| 12184806 |     | li63 | Prostate       | Prostate, prostatic carcinoma cells, LNCaP            | 9606  | GSE3451 |
| 12207890 |     | li25 | Cardiovascular | Blood, acute promyelocytic leukemia cells, NB4        | 9606  |         |
| 12207890 |     | li25 | Cardiovascular | Blood, leukemia, acute promyelocytic cells, HL-60     | 9606  |         |
| 12211056 |     | li43 | Testis         | Testis                                                | 9606  |         |
| 12220334 |     | li52 | Eye            | Eye, retina                                           | 10116 |         |
| 12239098 |     | li33 | Lung           | Lung, epithelial cells, A549                          | 9606  |         |
| 12370120 |     | li36 | Breast         | Mammary gland, mammary carcinoma cells, MCF-7         | 9606  |         |
| 12370120 |     | li47 | Breast         | Mammary gland, mammary carcinoma cells, MCF-7         | 9606  |         |
| 12370120 |     | li9  | Breast         | Mammary gland, mammary carcinoma cells, MCF-7         | 9606  |         |
| 12372818 |     | li36 | Cardiovascular | Endothelium, endothelial cells, umbilical vein, HUVEC | 9606  |         |
| 12376092 |     | li25 | Cardiovascular | Blood, acute promyelocytic leukemia cells, NB4        | 9606  |         |
| 12376347 |     | li33 | Lung           | Lung, primary fetal epithelial cells                  | 9606  |         |
| 12388319 |     | li48 | Cardiovascular | Heart, ventricle                                      | 10116 |         |
| 12395077 |     | li48 | CNS            | CNS, brain, whole                                     | 10116 |         |
| 12397630 |     | li25 | Others         | Forelimb. embryonic                                   | 10090 |         |
| 12409287 |     | li25 | Lung           | Lung, primary tracheobroncheal epithelial cells       | 9606  |         |
| 12435483 |     | 1077 | CNS            | CNS, hypothalamus                                     | 10116 |         |
| 12435483 |     | li40 | CNS            | CNS, hypothalamus                                     | 10116 |         |
| 12437973 | 3A1 |      | Bone           | Bone, primary osteoblasts                             | 10116 |         |
| 12454038 |     | li33 | Bone           | Bone, trabecular meshwork cells                       | 9606  |         |
| 12459711 |     | li36 | Breast         | Mammary gland, mammary carcinoma cells, MCF-7         | 9606  |         |
| 12460798 |     | li48 |                | Tail                                                  | 8355  |         |
| 12469912 |     | li36 | Bone           | Bone                                                  | 10090 |         |
| 12495930 | 3C1 |      | Lung           | Lung                                                  | 10090 |         |
| 12517795 |     | 1127 | Cardiovascular | Blood, leukemia, pre-B 697 cells                      | 9606  |         |
| 12520538 |     | li27 | Prostate       | Prostate, prostatic carcinoma cells, LNCaP            | 9606  |         |
| 12533672 |     | li2  | Cardiovascular | Blood, leukemia, acute promyelocytic cells, HL-60     | 9606  |         |
| 12533672 |     | li25 | Cardiovascular | Blood, leukemia, acute promyelocytic cells, HL-60     | 9606  |         |
| 12533672 |     | li42 | Cardiovascular | Blood, leukemia, acute promyelocytic cells, HL-60     | 9606  |         |
| 12554748 | 3A1 | li36 | Bone           | Bone                                                  | 10090 |         |
| 12554748 | 3A2 | li36 | Bone           | Bone                                                  | 10090 |         |
| 12554792 | 1C3 | 795  | Fat            | Adipose tissue, preadipocytes, 3T3-L1                 | 10090 |         |

|          |     |      |                  |                                                        |       |
|----------|-----|------|------------------|--------------------------------------------------------|-------|
| 12554792 | 1C3 | li6  | Fat              | Adipose tissue, preadipocytes, 3T3-L1                  | 10090 |
| 12554792 | 1C3 |      | Fat              | Adipose tissue, preadipocytes, 3T3-L1                  | 10090 |
| 12554792 | 1C3 |      | Fat              | Adipose tissue, preadipocytes, 3T3-L1                  | 10090 |
| 12554792 | 1C3 |      | Fat              | Adipose tissue, preadipocytes, 3T3-L1                  | 10090 |
| 12556371 |     | li33 | Cardiovascular   | Endothelium, endothelial cells, umbilical vein, HUVEC  | 9606  |
| 12574203 |     | li36 | Prostate         | Prostate, prostatic carcinoma cells, LNCaP             | 9606  |
| 12586626 |     | li25 | Cardiovascular   | Blood, acute promyelocytic leukemia cells, NB4         | 9606  |
| 12586626 |     | li25 | Cardiovascular   | Blood, leukemia, monocyte lymphoma cells, U937         | 9606  |
| 12591240 |     | li48 | CNS              | CNS, cerebellum                                        | 10090 |
| 12615711 |     | 1085 | Gastrointestinal | Intestine, colon carcinoma CaCo-2 cells                | 9606  |
| 12626434 |     | li52 | CNS              | CNS, neuroblastoma cells, SH-SY5Y                      | 9606  |
| 12639908 |     | li40 | Prostate         | Prostate, ventral                                      | 10116 |
| 12642470 |     | 795  | Liver            | Liver, hepatocytes, primary                            | 9606  |
| 12642470 |     | 1141 | Liver            | Liver, hepatocytes, primary                            | 9606  |
| 12642470 |     | li11 | Liver            | Liver, hepatocytes, primary                            | 9606  |
| 12642470 |     | li6  | Liver            | Liver, hepatocytes, primary                            | 9606  |
| 12655037 |     | 1071 | Ovary            | Ovary                                                  | 10116 |
| 12655037 |     | 1071 | Uterus           | Uterus                                                 | 10116 |
| 12663745 | 112 |      | Liver            | Liver                                                  | 10090 |
| 12676946 |     | li33 | Cardiovascular   | Blood, lymphoma cells, WEHI7.2                         | 10090 |
| 12676946 |     | li33 | Cardiovascular   | Blood, T cell lymphoma cells, S49.A2                   | 10090 |
| 12727805 |     | li38 | Liver            | Liver                                                  | 10090 |
| 12736248 |     | li33 | Cardiovascular   | Blood, lymphoma cells, WEHI7.2                         | 10090 |
| 12736248 |     | li33 | Cardiovascular   | Blood, T cell lymphoma cells, S49.A2                   | 10090 |
| 12770840 |     | li41 | Kidney           | Kidney, inner medullary collecting duct cells, mIMCD-3 | 10090 |
| 12782123 |     | li33 | Cardiovascular   | Blood, leukemia, lymphoid cells, CEM                   | 9606  |
| 12790782 |     | li36 | Breast           | Mammary gland, mammary carcinoma cells, MCF-7          | 9606  |
| 12790804 |     | li36 | Uterus           | Uterus                                                 | 10090 |
| 12798352 |     | li27 | Prostate         | Prostate, prostatic carcinoma cells, LNCaP             | 9606  |
| 12829444 |     | 1013 | Cardiovascular   | Artery, mesenteric                                     | 10116 |
| 12829444 |     | li36 | Cardiovascular   | Artery, mesenteric                                     | 10116 |
| 12829806 |     | li36 | Cardiovascular   | Heart                                                  | 10090 |
| 12840225 |     | li27 | Prostate         | Prostate, prostatic carcinoma cells, LNCaP             | 9606  |
| 12846840 |     | li48 | Cervix           | Cervix, cervical carcinoma cells, HeLa                 | 9606  |
| 12851464 |     | 1121 | Liver            | Liver                                                  | 10090 |
| 12853125 |     | 1013 | Breast           | Mammary gland, mammary carcinoma cells, MCF-7          | 9606  |
| 12853328 |     | li52 | CNS              | CNS, neuroblastoma cells, SH-SY5Y                      | 9606  |
| 12858337 | 111 | li27 | Kidney           | Kidney                                                 | 10090 |
| 12874827 |     | li27 | Immune           | Immune system, T-cells                                 | 10090 |
| 12875902 |     | li25 | Cardiovascular   | Blood, leukemia, acute promyelocytic cells, HL-60      | 9606  |
| 12875902 |     | li27 | Cardiovascular   | Blood, leukemia, acute promyelocytic cells, HL-60      | 9606  |
| 12889598 |     | li27 | Breast           | Mammary gland, mammary carcinoma cells, MCF-7          | 9606  |

|          |     |      |                |                                                    |       |        |
|----------|-----|------|----------------|----------------------------------------------------|-------|--------|
| 12889598 |     | li27 | Breast         | Mammary gland, mammary carcinoma cells, MDA-MB-321 | 9606  |        |
| 12893882 | 3A1 | li36 | Uterus         | Uterus                                             | 10090 |        |
| 12893882 | 3A2 | li36 | Uterus         | Uterus                                             | 10090 |        |
| 12894236 |     | li25 | Lung           | Lung, bronchial BEAS-2B cells                      | 9606  |        |
| 12894873 |     | li36 | CNS            | CNS, spinal cord                                   | 10090 |        |
| 12902984 | 3A2 | li36 | Breast         | Mammary gland, mammary carcinoma cells, MCF-7      | 9606  |        |
| 12914779 |     | 1121 | Cardiovascular | Blood, RAW264.7 macrophages                        | 10090 |        |
| 12914779 |     | li6  | Cardiovascular | Blood, RAW264.7 macrophages                        | 10090 |        |
| 12915738 |     | 1071 | Uterus         | Uterus                                             | 10090 |        |
| 12958197 | 1C1 |      | Liver          | Liver                                              | 10090 |        |
| 12959972 |     | li36 | Breast         | Mammary gland, mammary carcinoma cells, MCF-7      | 9606  |        |
| 12963864 |     | li33 | Bone           | Bone, trabecular meshwork cells                    | 9606  |        |
| 12972807 |     | 1017 | CNS            | CNS, neuroblastoma cells, CHP-134                  | 9606  |        |
| 12972807 |     | 1017 | CNS            | CNS, neuroblastoma cells, SK-N-SH                  | 9606  |        |
| 14503970 |     | li45 | Endometrium    | Endometrium, stromal cells                         | 9606  |        |
| 14505348 | 3A1 | li36 | Bone           | Bone, osteosarcoma cells, U2OS                     | 9606  |        |
| 14505348 | 3A2 | li36 | Bone           | Bone, osteosarcoma cells, U2OS                     | 9606  |        |
| 14519097 |     | li48 | Liver          | Liver                                              | 10090 |        |
| 14519446 |     | 1013 | Cardiovascular | Artery, mesenteric                                 | 10090 |        |
| 14519446 |     | li36 | Cardiovascular | Artery, mesenteric                                 | 10090 |        |
| 14522898 | 1C1 |      | Liver          | Liver, hepatocytes                                 | 10090 |        |
| 14585956 | 3B1 |      | Fat            | Adipose tissue, WAT                                | 10090 |        |
| 14605096 |     | 1077 | Testis         | Testis                                             | 10090 | GSE438 |
| 14605097 |     | li36 | Breast         | Mammary gland, mammary carcinoma cells, MCF-7      | 9606  |        |
| 14607780 |     | li25 | Lung           | Lung                                               | 10090 | GDS250 |
| 14607780 |     | li33 | Lung           | Lung                                               | 10090 | GDS250 |
| 14610279 |     | li36 | Breast         | Mammary gland, mammary carcinoma cells, MCF-7/BUS  | 9606  |        |
| 14623541 |     | li36 | Breast         | Mammary gland, mammary carcinoma cells, MCF-7      | 9606  |        |
| 14623541 |     | li47 | Breast         | Mammary gland, mammary carcinoma cells, MCF-7      | 9606  |        |
| 14623541 |     | li9  | Breast         | Mammary gland, mammary carcinoma cells, MCF-7      | 9606  |        |
| 14648872 |     | li36 | Testis         | Testis                                             | 10090 |        |
| 14648872 |     | li43 | Testis         | Testis                                             | 10090 |        |
| 14656206 | 1A1 | li48 | Liver          | Liver, hepatocellular carcinoma cells, HepG2       | 9606  |        |
| 14657025 | 4A1 |      | Immune         | Immune system, thymus, thymocytes                  | 10090 |        |
| 14664709 |     | li36 | Uterus         | Uterus                                             | 10090 |        |
| 14664709 |     | li43 | Uterus         | Uterus                                             | 10090 |        |
| 14667807 |     | li36 | Prostate       | Prostate, primary stroma                           | 9606  |        |
| 14699072 | 3A1 | 789  | Bone           | Bone, osteosarcoma cells, U2OS                     | 9606  |        |
| 14699072 | 3A2 | 789  | Bone           | Bone, osteosarcoma cells, U2OS                     | 9606  |        |
| 14699072 |     | li36 | Bone           | Bone, osteosarcoma cells, U2OS                     | 9606  |        |
| 14699072 |     | li36 | Bone           | Bone, osteosarcoma cells, U2OS                     | 9606  |        |
| 14699072 |     | li56 | Bone           | Bone, osteosarcoma cells, U2OS                     | 9606  |        |

|          |      |      |                  |                                                      |       |         |
|----------|------|------|------------------|------------------------------------------------------|-------|---------|
| 14699072 |      | li56 | Bone             | Bone, osteosarcoma cells, U2OS                       | 9606  |         |
| 14739056 |      | li36 | Endometrium      | Endometrium, endometrial carcinoma cells, Ishikawa H | 9606  |         |
| 14739056 |      | li36 | Breast           | Mammary gland, mammary carcinoma cells, MCF-7        | 9606  |         |
| 14739056 |      | li36 | Breast           | Mammary gland, mammary carcinoma cells, T47D         | 9606  |         |
| 14753745 |      | li27 | Bone             | Bone, osteoblasts, MC3T3-E1                          | 10090 |         |
| 14766007 |      | 1031 | Liver            | Liver                                                | 10090 |         |
| 14770183 |      | li25 | Cardiovascular   | Blood, leukemia, acute promyelocytic cells, HL-60    | 9606  | GSE995  |
| 14871586 |      | 819  | Testis           | Testis                                               | 10090 |         |
| 14871586 |      | li43 | Testis           | Testis                                               | 10090 |         |
| 14960510 |      | 1121 | Gastrointestinal | Stomach, gastric cancer cells, MKN28                 | 9606  |         |
| 14960510 |      | 1121 | Gastrointestinal | Stomach, gastric cancer cells, MKN45                 | 9606  |         |
| 14960510 |      | li60 | Gastrointestinal | Stomach, gastric cancer cells, MKN28                 | 9606  |         |
| 14960510 |      | li60 | Gastrointestinal | Stomach, gastric cancer cells, MKN45                 | 9606  |         |
| 14967907 |      | 1077 | CNS              | CNS, hypothalamus                                    | 10116 |         |
| 14967907 |      | li36 | CNS              | CNS, hypothalamus                                    | 10116 |         |
| 14967907 |      | li40 | CNS              | CNS, hypothalamus                                    | 10116 |         |
| 14977860 |      | li48 | Liver            | Liver, hepatocellular carcinoma cells, HepG2         | 9606  |         |
| 14978233 | 2B1  |      | Liver            | Liver                                                | 10090 |         |
| 14996737 |      | li33 | Breast           | Mammary gland, mammary carcinoma cells, MCF10A-Myc   | 9606  |         |
| 14996737 |      | li57 | Breast           | Mammary gland, mammary carcinoma cells, MCF10A-Myc   | 9606  |         |
| 14996990 |      | li27 | Gastrointestinal | Intestine, colon carcinoma CaCo-2 cells              | 9606  |         |
| 14999041 |      | 1029 | Liver            | Liver                                                | 10090 |         |
| 14999041 |      | li38 | Liver            | Liver                                                | 10090 |         |
| 14999041 |      | li6  | Liver            | Liver                                                | 10090 |         |
| 15042599 |      | li27 | Prostate         | Prostate, prostatic carcinoma cells, LNCaP           | 9606  |         |
| 15051727 | C245 | li38 | Liver            | Liver, hepatocytes                                   | 10090 |         |
| 15054141 |      | li6  | Cardiovascular   | Aorta                                                | 10090 | GSE1011 |
| 15072576 |      | li36 | Uterus           | Uterus                                               | 10090 |         |
| 15073165 |      | li13 | Fat              | Adipose tissue, WAT                                  | 10090 |         |
| 15073165 |      | li6  | Fat              | Adipose tissue, WAT                                  | 10090 |         |
| 15102944 | 112  | li33 | Gastrointestinal | Intestine, small                                     | 10116 |         |
| 15102944 | 112  | li33 | Liver            | Liver                                                | 10116 |         |
| 15102944 | 112  |      | Gastrointestinal | Intestine, small                                     | 10116 |         |
| 15102944 | 112  |      | Liver            | Liver                                                | 10116 |         |
| 15108064 |      | li36 | Bone             | Bone                                                 | 10116 |         |
| 15115731 |      | li40 | Testis           | Testis, epididymis                                   | 10090 |         |
| 15126236 | 1C3  | 909  | Pancreas         | Pancreas, islets                                     | 10116 | GP1921  |
| 15128445 | 1A2  | li48 | Fat              | Adipose tissue, WAT                                  | 10090 |         |
| 15128445 | 1A2  | li48 | CNS              | CNS, cerebellum                                      | 10090 |         |
| 15128445 | 1A2  | li48 | Cardiovascular   | Heart                                                | 10090 |         |
| 15131019 |      | li40 | Prostate         | Prostate, prostatic carcinoma cells, LNCaP           | 9606  |         |
| 15138554 |      | li40 | Prostate         | Prostate, prostatic carcinoma cells, LNCaP           | 9606  |         |

|          |     |      |                |                                                 |       |         |
|----------|-----|------|----------------|-------------------------------------------------|-------|---------|
| 15147890 |     | 1015 | Liver          | Liver, hepatocellular carcinoma cells, HepG2    | 9606  |         |
| 15148346 |     | li48 | Cardiovascular | Heart, primary cardiomyocytes                   | 10116 |         |
| 15159206 |     | 787  | Breast         | Mammary gland, mammary carcinoma cells, MCF-7   | 9606  |         |
| 15159206 |     | 1013 | Breast         | Mammary gland, mammary carcinoma cells, MCF-7   | 9606  |         |
| 15159206 |     | 1035 | Breast         | Mammary gland, mammary carcinoma cells, MCF-7   | 9606  |         |
| 15159206 |     | 1055 | Breast         | Mammary gland, mammary carcinoma cells, MCF-7   | 9606  |         |
| 15159206 |     | BPA  | Breast         | Mammary gland, mammary carcinoma cells, MCF-7   | 9606  |         |
| 15159206 |     | li36 | Breast         | Mammary gland, mammary carcinoma cells, MCF-7   | 9606  |         |
| 15159206 |     | li43 | Breast         | Mammary gland, mammary carcinoma cells, MCF-7   | 9606  |         |
| 15171707 |     | li43 | Vagina         | Vagina                                          | 10090 |         |
| 15171711 |     | li36 | Breast         | Mammary gland, mammary carcinoma cells, ZR-75.1 | 9606  |         |
| 15176476 |     | li36 | CNS            | CNS, hypothalamus                               | 10141 |         |
| 15212814 |     | 1071 | Liver          | Liver                                           | 10116 |         |
| 15217816 |     | 795  | Fat            | Adipose tissue, preadipocytes, 3T3-L1           | 10090 |         |
| 15217816 |     | 1141 | Fat            | Adipose tissue, preadipocytes, 3T3-L1           | 10090 |         |
| 15217816 |     | li6  | Fat            | Adipose tissue, preadipocytes, 3T3-L1           | 10090 |         |
| 15219810 |     | li36 | Cardiovascular | Artery, VSMCs                                   | 10116 |         |
| 15225810 |     | li27 | Bone           | Bone, osteoblasts, MC3T3-E1                     | 10090 |         |
| 15225817 |     | li27 | Immune         | Immune system, dendritic cells                  | 10090 |         |
| 15234464 |     | li48 | CNS            | CNS, cerebrum                                   | 10116 |         |
| 15253446 |     | li25 | Cardiovascular | Blood, acute promyelocytic leukemia cells, NB4  | 9606  |         |
| 15254972 |     | li36 | Breast         | Mammary gland, mammary carcinoma cells, MCF-7   | 9606  |         |
| 15254972 |     | li36 | Breast         | Mammary gland, mammary carcinoma cells, ZR-75.1 | 9606  |         |
| 15276619 |     | li36 | CNS            | CNS, pituitary cells, G3                        | 10116 |         |
| 15276619 |     | li9  | CNS            | CNS, pituitary cells, G3                        | 10116 |         |
| 15283691 |     | li48 | Cardiovascular | Heart                                           | 10090 |         |
| 15289156 |     | 1013 | Uterus         | Uterus                                          | 10090 |         |
| 15289156 |     | li36 | Uterus         | Uterus                                          | 10090 | GSE1839 |
| 15289156 |     | li43 | Uterus         | Uterus                                          | 10090 | GSE1839 |
| 15291752 |     | li33 | Bone           | Bone, osteoblasts, MC3T3-E1                     | 10090 |         |
| 15291756 |     | 787  | Uterus         | Uterus                                          | 10090 |         |
| 15291756 |     | li36 | Uterus         | Uterus                                          | 10090 |         |
| 15296482 |     | li36 | Bone           | Bone                                            | 10090 |         |
| 15296482 |     | li36 | Liver          | Liver                                           | 10090 |         |
| 15300237 |     | li27 | Prostate       | Prostate, prostatic carcinoma cells, PC-3       | 9606  |         |
| 15312171 |     | li60 | CNS            | CNS, primary microglia                          | 9606  |         |
| 15319356 | 3A1 | li36 | Liver          | Liver                                           | 10090 |         |
| 15319356 | 3A2 | li36 | Liver          | Liver                                           | 10090 |         |
| 15333513 |     | li11 | Liver          | Liver, hepatocytes                              | 9606  |         |
| 15336700 |     | li36 | Breast         | Mammary gland, mammary carcinoma cells, MCF-7   | 9606  |         |
| 15340120 |     | li25 |                | Embryonal carcinoma cells, P19                  | 10090 |         |
| 15345050 |     | li36 | Breast         | Mammary gland, mammary carcinoma cells, T47D    | 9606  |         |

|          |     |      |                  |                                                   |       |
|----------|-----|------|------------------|---------------------------------------------------|-------|
| 15345050 |     | li9  | Breast           | Mammary gland, mammary carcinoma cells, T47D      | 9606  |
| 15358834 |     | 1077 | Prostate         | Prostate                                          | 10116 |
| 15361828 |     | li2  | Breast           | Mammary gland, mammary carcinoma cells, T47D      | 9606  |
| 15368355 |     | li27 | Prostate         | Prostate, prostatic carcinoma ALVA-31 cells       | 9606  |
| 15378649 |     | 1013 | Prostate         | Prostate, prostatic carcinoma cells, LNCaP        | 9606  |
| 15385411 |     | 811  | Ovary            | Ovary, periovulatory granulosa cells              | 10090 |
| 15452555 |     | 897  | Prostate         | Prostate, prostatic carcinoma cells, LNCaP        | 9606  |
| 15452555 |     | li40 | Prostate         | Prostate, prostatic carcinoma cells, LNCaP        | 9606  |
| 15465002 |     | li25 | Lung             | Lung, primary bronchial epithelial cells          | 9606  |
| 15466464 | 3B1 |      | Gastrointestinal | Intestine, small, epithelium                      | 10090 |
| 15466718 |     | li25 | CNS              | CNS, neural crest cells                           | 10090 |
| 15473135 |     | li36 | Breast           | Mammary gland, mammary carcinoma cells, MCF-7     | 9606  |
| 15476863 |     | 805  | Testis           | Testis                                            | 10116 |
| 15489002 |     | li27 | Skin             | Skin, fibroblasts                                 | 9606  |
| 15494641 |     | li36 | Breast           | Mammary gland, mammary carcinoma cells, MCF-7     | 9606  |
| 15498508 |     | li2  | Cardiovascular   | Blood, leukemia, acute promyelocytic cells, HL-60 | 9606  |
| 15498508 |     | li25 | Cardiovascular   | Blood, leukemia, acute promyelocytic cells, HL-60 | 9606  |
| 15501915 |     | li33 | Lung             | Lung, epithelial cells, A549                      | 9606  |
| 15507505 | 1A2 | li48 | Skin             | Skin, fibroblasts                                 | 9606  |
| 15514030 |     | li36 | Breast           | Mammary gland, mammary carcinoma cells, MCF-7     | 9606  |
| 15520459 | 2A1 |      | Pancreas         | Pancreas, beta cells, INS1                        | 10116 |
| 15528273 |     | li36 | Uterus           | Uterus                                            | 10090 |
| 15542054 |     | li27 | Gastrointestinal | Intestine, small                                  | 10116 |
| 15548683 |     | li36 | Breast           | Mammary gland, mammary carcinoma cells, MCF-7     | 9606  |
| 15550503 | 1A1 | li48 | Stem cells       | Stem cells, embryonic, J1                         | 10090 |
| 15555570 | 3C4 | li63 | Prostate         | Prostate, prostatic carcinoma cells, LNCaP        | 9606  |
| 15555907 |     | li27 | Prostate         | Prostate, epithelial cells, primary               | 9606  |
| 15564322 |     | li36 | Uterus           | Uterus                                            | 10090 |
| 15564322 |     | li57 | Uterus           | Uterus                                            | 10090 |
| 15576828 |     | li36 | Uterus           | Uterus                                            | 10090 |
| 15576828 |     | li56 | Uterus           | Uterus                                            | 10090 |
| 15579445 |     | li36 | Cardiovascular   | Artery, VSMCs                                     | 9606  |
| 15589683 | 1C3 |      | Liver            | Liver                                             | 10090 |
| 15592090 |     | li25 | Cardiovascular   | Bladder, bladder cancer cells, UM-UC-6            | 9606  |
| 15592090 |     | li42 | Cardiovascular   | Bladder, bladder cancer cells, UM-UC-6            | 9606  |
| 15596064 |     | li12 | Liver            | Liver                                             | 10116 |
| 15596064 |     | li12 | Placenta         | Placenta                                          | 10116 |
| 15596064 |     | li34 | Liver            | Liver                                             | 10116 |
| 15596064 |     | li34 | Placenta         | Placenta                                          | 10116 |
| 15598610 |     | li36 | Uterus           | Uterus                                            | 10090 |
| 15601916 |     | 1077 | Testis           | Testis                                            | 10090 |
| 15604281 |     | 789  | CNS              | CNS, glioma cells, U87MG                          | 9606  |

GSE2195

|          |          |                   |                                                                       |       |         |
|----------|----------|-------------------|-----------------------------------------------------------------------|-------|---------|
| 15608142 | li33     | Connective tissue | Connective tissue, RBL-2H3 Mast cells                                 | 10116 |         |
| 15608294 | li36     | Breast            | Mammary gland, mammary carcinoma cells, MCF-7                         | 9606  |         |
| 15609106 | li27     | Bone              | Bone marrow                                                           | 10090 |         |
| 15613410 | 1111     | Cardiovascular    | Endothelium, endothelial cells, microvascular endometrial cells, HEEC | 9606  |         |
| 15613410 | li36     | Cardiovascular    | Endothelium, endothelial cells, microvascular endometrial cells, HEEC | 9606  |         |
| 15623829 | 1013     | Liver             | Liver                                                                 | 10090 |         |
| 15637295 | C28 li36 | Breast            | Mammary gland, mammary carcinoma cells, MCF-7                         | 9606  |         |
| 15638253 | li33     | Cardiovascular    | Blood, leukemia, lymphoid cells, CEM                                  | 9606  |         |
| 15638997 | li61     | Prostate          | Prostate, prostatic carcinoma cells, DU145                            | 9606  |         |
| 15666095 | li36     | Endometrium       | Endometrium                                                           | 9606  |         |
| 15674352 | li45     | Ovary             | Ovary, ovarian carcinoma cells, HOSE 12-12                            | 9606  |         |
| 15674352 | li45     | Ovary             | Ovary, ovarian carcinoma cells, HOSE 642                              | 9606  |         |
| 15674352 | li45     | Ovary             | Ovary, ovarian carcinoma cells, HOSE 6-8                              | 9606  |         |
| 15674352 | li45     | Ovary             | Ovary, ovarian carcinoma cells, OVCA 420                              | 9606  |         |
| 15674352 | li45     | Ovary             | Ovary, ovarian carcinoma cells, OVCA 429                              | 9606  |         |
| 15674352 | li45     | Ovary             | Ovary, ovarian carcinoma cells, OVCA 432                              | 9606  |         |
| 15679045 | li33     | Breast            | Mammary carcinoma BT20 cells                                          | 9606  |         |
| 15684350 | li40     | Muscle            | Muscle, skeletal muscle                                               | 10090 |         |
| 15686872 | li36     | Ovary             | Ovary                                                                 | 10116 |         |
| 15686872 | li36     | Uterus            | Uterus                                                                | 10116 |         |
| 15691878 | li36     | Breast            | Mammary gland, mammary carcinoma cells, MCF-7                         | 9606  |         |
| 15691878 | li47     | Breast            | Mammary gland, mammary carcinoma cells, MCF-7                         | 9606  |         |
| 15694358 | li60     | Bone              | Bone, chondrosarcoma cells, OUMS27                                    | 9606  |         |
| 15721199 | li36     | Testis            | Testis, testicular cancer cells, TM4                                  | 9606  |         |
| 15721199 | li43     | Testis            | Testis, testicular cancer cells, TM4                                  | 9606  |         |
| 15735696 | li25     | Cardiovascular    | Blood, leukemia, monocyte lymphoma cells, U937                        | 9606  |         |
| 15755903 | li33     | Immune            | Immune, CD34+ cells                                                   | 9606  |         |
| 15755993 | li36     | Breast            | Mammary gland, mammary carcinoma cells, MCF-7                         | 9606  |         |
| 15755993 | li9      | Breast            | Mammary gland, mammary carcinoma cells, MCF-7                         | 9606  |         |
| 15757668 | 1013     | Breast            | Mammary gland, mammary carcinoma cells, MCF-7                         | 9606  |         |
| 15757668 | 1025     | Breast            | Mammary gland, mammary carcinoma cells, MCF-7                         | 9606  |         |
| 15757668 | li36     | Breast            | Mammary gland, mammary carcinoma cells, MCF-7                         | 9606  |         |
| 15766595 | li36     | Mullerian duct    | Mullerian duct, primitive EMTOKA cells                                | 9606  |         |
| 15766595 | li43     | Mullerian duct    | Mullerian duct, primitive EMTOKA cells                                | 9606  |         |
| 15767336 | li40     | Prostate          | Prostate, prostatic carcinoma cells, LNCaP                            | 9606  | GSE4399 |
| 15767336 | li40     | Prostate          | Prostate, prostatic carcinoma cells, LNCaP                            | 9606  | GSE4300 |
| 15770638 | li25     | Cardiovascular    | Blood, peripheral mononuclear cells                                   | 9606  |         |
| 15770638 | li25     | Bone              | Bone marrow, mononuclear cells                                        | 9606  |         |
| 15780976 | 1A1      | Bone              | Bone, vertebrae                                                       | 10090 |         |
| 15780976 | 1A2      | Bone              | Bone, vertebrae                                                       | 10090 |         |
| 15790403 | li61     | Prostate          | Prostate, prostatic carcinoma cells, LNCaP                            | 9606  |         |
| 15802376 | li36     | Bone              | Bone, osteosarcoma cells, U2OS                                        | 9606  | GSE2292 |



|          |      |                   |                                                    |                                               |         |
|----------|------|-------------------|----------------------------------------------------|-----------------------------------------------|---------|
| 15802376 | li47 | Bone              | Bone, osteosarcoma cells, U2OS                     | 9606                                          |         |
| 15816354 | 789  | Uterus            | Uterus                                             | 10090                                         |         |
| 15821115 | li36 | Breast            | Mammary gland, mammary carcinoma cells, MDA-MB-321 | 9606                                          | GSE2251 |
| 15821585 | li40 | Prostate          | Prostate, prostatic carcinoma cells, LNCaP         | 9606                                          |         |
| 15826934 | li33 | Gastrointestinal  | Intestine, jejunum                                 | 10090                                         |         |
| 15831674 | 789  | Breast            | Mammary gland, mammary carcinoma cells, MCF-7aro   | 9606                                          |         |
| 15831674 | 1077 | Breast            | Mammary gland, mammary carcinoma cells, MCF-7aro   | 9606                                          |         |
| 15831674 | li36 | Breast            | Mammary gland, mammary carcinoma cells, MCF-7aro   | 9606                                          |         |
| 15834898 | 1071 | Ovary             | Ovary                                              | 10116                                         |         |
| 15834898 | 1071 | Uterus            | Uterus                                             | 10116                                         |         |
| 15846301 | li43 | Prostate          | Prostate, prostatic carcinoma cells, LNCaP         | 9606                                          |         |
| 15846301 | li43 | Prostate          | Prostate, prostatic carcinoma cells, PC-3          | 9606                                          |         |
| 15860228 | li33 | Connective tissue | Connective tissue, RBL-2H3 Mast cells              | 9606                                          |         |
| 15862823 | li36 | CNS               | CNS, hypothalamus                                  | 10144                                         |         |
| 15866426 | 1111 | Breast            | Mammary gland, mammary carcinoma cells, T47D       | 9606                                          |         |
| 15866426 | li36 | Breast            | Mammary gland, mammary carcinoma cells, T47D       | 9606                                          |         |
| 15879465 | li36 | Uterus            | Uterus, uterine leiomyoma cells                    | 9606                                          |         |
| 15887248 | li61 | Prostate          | Prostate, prostatic carcinoma cells, LNCaP         | 9606                                          |         |
| 15894607 | li25 | Cardiovascular    | Blood, acute promyelocytic leukemia cells, NB4     | 9606                                          |         |
| 15896901 | li48 | CNS               | CNS. pituitary, thyrotropes                        | 10090                                         |         |
| 15897880 | li25 | Kidney            | Kidney, Wilms tumor cells                          | 9606                                          |         |
| 15914576 | 805  | Liver             | Liver                                              | 10116                                         |         |
| 15914576 | 1097 | Liver             | Liver                                              | 10116                                         | GSE2303 |
| 15930295 | li27 | Prostate          | Prostate, prostatic carcinoma cells, LNCaP         | 9606                                          |         |
| 15946989 | li33 | Muscle            | Muscle, skeletal myocytes                          | 9606                                          |         |
| 15951637 | li27 | Cardiovascular    | Blood, leukemia, acute promyelocytic cells, HL-60  | 9606                                          |         |
| 15953391 | 1071 | Liver             | Liver                                              | 10116                                         | GSE2495 |
| 15978052 | li36 | Breast            | Mammary gland, mammary carcinoma cells, MCF-7      | 9606                                          |         |
| 15978052 | li52 | Breast            | Mammary gland, mammary carcinoma cells, MCF-7      | 9606                                          |         |
| 15986123 | li36 | Breast            | Mammary carcinoma BT-474 cells                     | 9606                                          |         |
| 15986123 | li36 | Breast            | Mammary gland, mammary carcinoma cells, MCF-7      | 9606                                          |         |
| 15986123 | li36 | Breast            | Mammary gland, mammary carcinoma cells, T47D       | 9606                                          |         |
| 15993751 | 1141 | Lung              | Lung, epithelial cells, A549                       | 9606                                          |         |
| 15993751 | li60 | Lung              | Lung, epithelial cells, A549                       | 9606                                          |         |
| 16002434 | li27 | Others            | Head and neck squamous carcinoma cells, SCC25      | 9606                                          |         |
| 16007190 | 2A1  | Kidney            | Kidney, embryonic kidney cells, HEK293             | 9606                                          |         |
| 16009131 | 3A1  | li36              | Breast                                             | Mammary gland, mammary carcinoma cells, MCF-7 | 9606    |
| 16012168 | li23 | Liver             | Liver, hepatocellular carcinoma cells, HepG2       | 9606                                          |         |
| 16013040 | 787  | Liver             | Liver                                              | 10116                                         |         |
| 16024246 | li27 | Prostate          | Prostate, epithelial cells, primary                | 9606                                          |         |
| 16024246 | li27 | Prostate          | Prostate, prostatic carcinoma cells, LNCaP         | 9606                                          |         |
| 16029874 | li36 | Breast            | Mammary gland, mammary carcinoma cells, MCF-7      | 9606                                          |         |

|          |      |                  |                                                         |                                               |      |
|----------|------|------------------|---------------------------------------------------------|-----------------------------------------------|------|
| 16029884 | li36 | Eye              | Eye, retina, retinal pigment epithelium (ARPE-19) cells | 9606                                          |      |
| 16076730 | 805  | Liver            | Liver                                                   | 10116                                         |      |
| 16079270 | 891  | Bone             | Bone                                                    | 10116                                         |      |
| 16079270 | 1071 | Bone             | Bone                                                    | 10116                                         |      |
| 16079270 | li56 | Bone             | Bone                                                    | 10116                                         |      |
| 16086434 | li36 | Testis           | Testis, epididymis                                      | 10090                                         |      |
| 16086434 | li43 | Testis           | Testis, epididymis                                      | 10090                                         |      |
| 16087863 | 3A1  | li36             | Breast                                                  | Mammary gland, mammary carcinoma cells, MCF-7 | 9606 |
| 16093247 | li27 | Ovary            | Ovary, ovarian carcinoma cells, OVCAR3                  | 9606                                          |      |
| 16095599 | li27 | Cardiovascular   | Artery, coronary, smooth muscle cells                   | 9606                                          |      |
| 16099209 | 1029 | Liver            | Liver                                                   | 10090                                         |      |
| 16110338 | 2E3  | Eye              | Eye, retina                                             | 10090                                         |      |
| 16110340 | 3C1  | li36             | Liver                                                   | 10090                                         |      |
| 16116479 | li36 | Ovary            | Ovary, ovarian carcinoma cells, HOSE 12-12              | 9606                                          |      |
| 16116479 | li36 | Ovary            | Ovary, ovarian carcinoma cells, HOSE 642                | 9606                                          |      |
| 16116479 | li36 | Ovary            | Ovary, ovarian carcinoma cells, HOSE 6-8                | 9606                                          |      |
| 16116479 | li36 | Ovary            | Ovary, ovarian carcinoma cells, OVCA 420                | 9606                                          |      |
| 16116479 | li36 | Ovary            | Ovary, ovarian carcinoma cells, OVCA 429                | 9606                                          |      |
| 16116479 | li36 | Ovary            | Ovary, ovarian carcinoma cells, OVCA 432                | 9606                                          |      |
| 16133145 | li36 | Vagina           | Vagina                                                  | 10090                                         |      |
| 16142410 | li15 | Endothelium      | Endothelium, endothelial cells                          | 9606                                          |      |
| 16142410 | li24 | Cardiovascular   | Endothelium, endothelial cells                          | 9606                                          |      |
| 16142410 | li42 | Cardiovascular   | Endothelium, endothelial cells                          | 9606                                          |      |
| 16142846 | li27 | Gastrointestinal | Intestine, colon                                        | 10090                                         |      |
| 16144839 | li27 | Bone             | Bone, osteoblasts, MC3T3-E1                             | 10090                                         |      |
| 16144937 | li33 | Ovary            | Ovary, ovarian carcinoma cells, OV-MZ-30                | 9606                                          |      |
| 16144937 | li33 | Ovary            | Ovary, ovarian carcinoma cells, OV-MZ-31                | 9606                                          |      |
| 16166078 | li40 | Breast           | Mammary gland, mammary carcinoma cells, MDA-MB-453      | 9606                                          |      |
| 16166078 | li40 | Prostate         | Prostate, prostatic carcinoma cells, 22RV1              | 9606                                          |      |
| 16166195 | 3C4  | Testis           | Testis, Sertoli cells                                   | 10090                                         |      |
| 16169203 | 1013 | Bone             | Bone                                                    | 10090                                         |      |
| 16172422 | 1077 | Kidney           | Kidney, renal proximal tubule, HKC-8 cells              | 9606                                          |      |
| 16174780 | 1071 | Uterus           | Uterus                                                  | 10090                                         |      |
| 16174780 | 1071 | Uterus           | Uterus                                                  | 10116                                         |      |
| 16182522 | li33 | CNS              | CNS, Schwann cells MSC80                                | 10090                                         |      |
| 16202214 | 1C3  | Pancreas         | Pancreas, stellate cells                                | 10116                                         |      |
| 16220113 | li4  | Liver            | Liver, hepatocellular carcinoma cells, HepG2            | 9606                                          |      |
| 16223480 | li12 | Liver            | Liver                                                   | 10116                                         |      |
| 16223480 | li34 | Liver            | Liver                                                   | 10116                                         |      |
| 16239032 | li35 | Cardiovascular   | Blood, macrophages                                      | 8022                                          |      |
| 16240454 | li40 | Prostate         | Prostate, epithelial cells, M12                         | 9606                                          |      |
| 16249480 | li25 | Eye              | Eye, conjunctival epithelial cells, HCjE                | 9606                                          |      |

|          |     |      |                |                                                      |       |         |
|----------|-----|------|----------------|------------------------------------------------------|-------|---------|
| 16249502 |     | 1033 | Eye            | Eye                                                  | 10090 |         |
| 16251721 | 1H4 |      | Adrenal        | Adrenal gland, adrenocarcinoma cells, H295R          | 9606  |         |
| 16258703 |     | li36 | Breast         | Mammary gland, mammary carcinoma cells, MCF-7        | 9606  |         |
| 16273356 |     | li36 | Breast         | Mammary gland, mammary carcinoma cells, MCF-7        | 9606  |         |
| 16280211 |     | 787  | Breast         | Mammary gland, mammary carcinoma cells, MCF-7        | 9606  |         |
| 16280211 |     | 889  | Breast         | Mammary gland, mammary carcinoma cells, MCF-7        | 9606  |         |
| 16281084 |     | 835  | Prostate       | Prostate, prostatic carcinoma cells, LNCaP           | 9606  |         |
| 16285565 |     | 789  | Breast         | Mammary gland tumors                                 | 9606  |         |
| 16289307 |     | li33 | Endometrium    | Endometrium, endometrial carcinoma cells, Ishikawa H | 9606  |         |
| 16289307 |     | li45 | Endometrium    | Endometrium, endometrial carcinoma cells, Ishikawa H | 9606  |         |
| 16298037 | 3A1 | 789  | Breast         | Mammary gland, mammary carcinoma cells, MDA-MB-321   | 9606  |         |
| 16298037 |     | li36 | Breast         | Mammary gland, mammary carcinoma cells, MDA-MB-321   | 9606  |         |
| 16298037 |     | li56 | Breast         | Mammary gland, mammary carcinoma cells, MDA-MB-321   | 9606  |         |
| 16298037 |     | li9  | Breast         | Mammary gland, mammary carcinoma cells, MDA-MB-321   | 9606  |         |
| 16304452 |     | 1077 |                | Salivary gland, submandibular gland                  | 10090 |         |
| 16309552 | 4A2 |      | Muscle         | Synoviocyte, immortalised cells, K4IM                | 9606  |         |
| 16319822 |     | li33 | Eye            | Eye, lens cells HLE B-3                              | 9606  |         |
| 16319822 |     | li33 | Eye            | Eye, primary lens epithelial cells                   | 9606  |         |
| 16322326 | 3A1 | li36 | Ovary          | Ovary, ovarian carcinoma cells, PEO1                 | 9606  |         |
| 16339527 |     | 953  | Cardiovascular | Blood, lymphocytes, naive DO11.10 T                  | 10090 |         |
| 16342170 |     | li36 | CNS            | CNS, Muller cells                                    | 9606  |         |
| 16357043 | 1C1 | li38 | Liver          | Liver                                                | 10090 |         |
| 16371446 |     | 1015 | Liver          | Liver, hepatocytes, primary                          | 9606  |         |
| 16371446 |     | li15 | Liver          | Liver, hepatocytes, primary                          | 9606  |         |
| 16373508 | 3C4 |      | Ovary          | Ovary                                                | 10090 |         |
| 16376865 |     | li45 | CNS            | CNS, hypothalamus (mediobasal)/preoptic area         | 10116 |         |
| 16380219 | 1C3 |      | Fat            | Adipose tissue, adipocytes, primary                  | 9606  |         |
| 16382674 |     | li36 | Hair           | Hair, scalp hair follicles                           | 9606  |         |
| 16384958 |     | li36 | Eye            | Eye, lacrimal glands                                 | 10090 |         |
| 16384958 |     | li45 | Eye            | Eye, I+I437acrimal glands                            | 10090 |         |
| 16396664 |     | li36 | CNS            | CNS, trigeminal ganglia                              | 10116 |         |
| 16443354 |     | li25 | Breast         | Mammary gland, mammary carcinoma cells, MCF-7        | 9606  |         |
| 16445620 |     | li36 | Endometrium    | Endometrium, endometrial carcinoma cells, ECC-1      | 9606  |         |
| 16445620 |     | li45 | Endometrium    | Endometrium, endometrial carcinoma cells, PRAB-36    | 9606  |         |
| 16455494 | 3A1 | li36 | Breast         | Mammary gland, mammary carcinoma cells, MCF-7        | 9606  |         |
| 16461929 |     | li36 | Uterus         | Uterus                                               | 10090 |         |
| 16463047 | 3A1 | li36 | Liver          | Liver                                                | 10090 |         |
| 16463047 | 3A2 |      | Liver          | Liver                                                | 10090 |         |
| 16469803 | 3A1 | 913  | Uterus         | Uterus                                               | 10090 | GSE4615 |
| 16469803 |     | 981  | Uterus         | Uterus                                               | 10090 | GSE4615 |
| 16469803 |     | li36 | Uterus         | Uterus                                               | 10090 | GSE4615 |
| 16474171 |     | 1013 | Breast         | Mammary gland, mammary carcinoma cells, MCF-7        | 9606  |         |

|          |      |                  |                                                      |       |         |
|----------|------|------------------|------------------------------------------------------|-------|---------|
| 16474171 | BPA  | Breast           | Mammary gland, mammary carcinoma cells, MCF-7        | 9606  |         |
| 16474171 | li36 | Breast           | Mammary gland, mammary carcinoma cells, MCF-7        | 9606  |         |
| 16484547 | 1013 | Immune           | Immune system, thymus                                | 10090 |         |
| 16484547 | li36 | Immune           | Immune system, thymus                                | 10090 | GSE2889 |
| 16497877 | li56 | Cardiovascular   | Blood, myeloma cells, U266                           | 9606  |         |
| 16497877 | li56 |                  | Myeloma cells, JJN-3                                 | 9606  |         |
| 16498641 | 835  | Testis           | Testis, fetal                                        | 10116 |         |
| 16502254 | li27 | Pancreas         | Pancreas, islets                                     | 9606  |         |
| 16508948 | li25 | Breast           | Mammary gland, mammary carcinoma cells, SC-3         | 10090 |         |
| 16508948 | li27 | Breast           | Mammary gland, mammary carcinoma cells, SC-3         | 10090 |         |
| 16508948 | li42 | Breast           | Mammary gland, mammary carcinoma cells, SC-3         | 10090 |         |
| 16510352 | li43 | Immune           | Immune system, thymus                                | 10090 |         |
| 16514628 | li36 | Breast           | Mammary gland, mammary carcinoma cells, ZR-75.1      | 9606  | GSE1864 |
| 16514628 | li47 | Breast           | Mammary gland, mammary carcinoma cells, ZR-75.1      | 9606  | GSE1864 |
| 16514628 | li56 | Breast           | Mammary gland, mammary carcinoma cells, ZR-75.1      | 9606  | GSE1864 |
| 16515397 | 1005 | Liver            | Liver, hepatocytes, primary                          | 10116 |         |
| 16515397 | 1097 | Liver            | Liver, hepatocytes, primary                          | 10116 |         |
| 16515397 | li38 | Liver            | Liver, hepatocytes, primary                          | 10116 |         |
| 16519913 | li36 | Liver            | Liver, hepatoma cells, Hepa-1c1c7                    | 10090 |         |
| 16533169 | 1F3  | Immune           | Immune system, thymus, thymocytes                    | 10090 |         |
| 16541013 | li33 | Bone             | Bone, trabecular meshwork cells                      | 9606  |         |
| 16569247 | 1029 | Endometrium      | Endometrium, endometrial carcinoma cells, Ishikawa H | 9606  |         |
| 16574741 | li40 | Prostate         | Prostate, prostatic carcinoma cells, LNCaP           | 9606  | GSE4636 |
| 16606439 | li36 | Breast           | Mammary carcinoma BT-474 cells                       | 9606  |         |
| 16606439 | li36 | Breast           | Mammary gland, mammary carcinoma cells, MCF-7        | 9606  |         |
| 16606439 | li36 | Breast           | Mammary gland, mammary carcinoma cells, T47D         | 9606  |         |
| 16606623 | 1I2  | Bone             | Bone, osteosarcoma cells, MG63                       | 9606  |         |
| 16611858 | 835  | Liver            | Liver                                                | 10090 |         |
| 16618389 | 2A1  | Gastrointestinal | Intestine, colon                                     | 10090 |         |
| 16627594 | li36 | Liver            | Liver                                                | 10090 |         |
| 16635017 | li52 | Cardiovascular   | Blood, peripheral mononuclear cells                  | 9606  |         |
| 16636312 | li43 | Vagina           | Vagina                                               | 10090 |         |
| 16639697 | 1077 | Cardiovascular   | Artery, VSMCs                                        | 9606  |         |
| 16705744 | 1013 | Endometrium      | Endometrium, endometrial carcinoma cells, Ishikawa H | 9606  |         |
| 16705744 | li36 | Endometrium      | Endometrium, endometrial carcinoma cells, Ishikawa H | 9606  |         |
| 16714383 | 2A1  | Liver            | Liver                                                | 10090 |         |
| 16758764 | li36 | Breast           | Mammary gland, mammary carcinoma cells, MCF-7        | 9606  |         |
| 16794013 | li36 | Uterus           | Uterus, uterine epithelium                           | 10090 |         |
| 16794013 | li45 | Uterus           | Uterus, uterine epithelium                           | 10090 |         |
| 16797178 | 1059 | Preputial gland  | Preputial gland                                      | 10090 |         |
| 16797178 | 1059 | Prostate         | Prostate                                             | 10090 |         |
| 16797178 | 1059 | Testis           | Testis, seminal vesicles                             | 10090 |         |

|          |     |      |                 |                                                       |       |         |
|----------|-----|------|-----------------|-------------------------------------------------------|-------|---------|
| 16797178 |     | li40 | Preputial gland | Preputial gland                                       | 10090 |         |
| 16797178 |     | li40 | Prostate        | Prostate                                              | 10090 |         |
| 16797178 |     | li40 | Testis          | Testis, seminal vesicles                              | 10090 |         |
| 16806905 |     | li36 | Breast          | Mammary gland, mammary carcinoma cells, MCF-7         | 9606  |         |
| 16806905 |     | li47 | Breast          | Mammary gland, mammary carcinoma cells, MCF-7         | 9606  |         |
| 16809442 | 3A2 | li36 | Breast          | Mammary gland, mammary carcinoma cells, MCF-7         | 9606  |         |
| 16816113 |     | li57 | CNS             | CNS, Purkinje cells                                   | 10090 |         |
| 16844382 |     | li35 | CNS             | CNS, brain aggregates, fetal                          | 9606  |         |
| 16847062 |     | li36 | Uterus          | Uterus, uterine epithelium                            | 10090 |         |
| 16847355 |     | li27 | Cardiovascular  | Blood, leukemia, acute promyelocytic cells, HL-60     | 9606  |         |
| 16849584 |     | 789  | Breast          | Mammary gland, mammary carcinoma cells, MCF-7         | 9606  |         |
| 16849584 |     | li36 | Breast          | Mammary gland, mammary carcinoma cells, MCF-7         | 9606  |         |
| 16865672 |     | 1013 | Prostate        | Prostate, prostatic carcinoma cells, LNCaP            | 9606  |         |
| 16872691 |     | 1071 | Liver           | Liver                                                 | 7955  |         |
| 16873370 |     | li36 | Bone            | Bone, osteosarcoma cells, U2OS                        | 9606  |         |
| 16879168 |     | li36 | CNS             | CNS, hypothalamus, medial basal                       | 10090 |         |
| 16882715 |     | 1013 | Breast          | Mammary gland, mammary carcinoma cells, MCF-7         | 9606  |         |
| 16882715 |     | li36 | Breast          | Mammary gland, mammary carcinoma cells, MCF-7         | 9606  | GSE5200 |
| 16885501 |     | li25 | Cardiovascular  | Blood, leukemia, myeloblastic cells, ML-1             | 9606  |         |
| 16932916 |     | li40 | Prostate        | Prostate, prostatic carcinoma cells, LNCaP            | 9606  | GSE4456 |
| 16932916 |     | li63 | Prostate        | Prostate, prostatic carcinoma cells, LNCaP            | 9606  | GSE4456 |
| 16940010 |     | 1059 | Liver           | Liver                                                 | 10116 |         |
| 16940010 |     | 1071 | Liver           | Liver                                                 | 10116 |         |
| 16940010 |     | 1121 | Liver           | Liver                                                 | 10116 |         |
| 16940010 |     | li34 | Liver           | Liver                                                 | 10116 |         |
| 16940010 |     | li38 | Liver           | Liver                                                 | 10116 |         |
| 16951191 |     | li13 | Breast          | Mammary gland, mammary carcinoma cells, MCF-7         | 9606  |         |
| 16951191 |     | li25 | Breast          | Mammary gland, mammary carcinoma cells, MCF-7         | 9606  |         |
| 16951191 |     | li42 | Breast          | Mammary gland, mammary carcinoma cells, MCF-7         | 9606  |         |
| 16959845 |     | 1013 | Fat             | Adipose tissue, WAT                                   | 10090 |         |
| 16959845 |     | li36 | Fat             | Adipose tissue, WAT                                   | 10090 |         |
| 16971488 |     | li36 | CNS             | CNS, cerebral cortex                                  | 10116 |         |
| 16973978 | 1F1 |      | Lung            | Lung                                                  | 10090 |         |
| 16977382 |     | li36 | Cardiovascular  | Aorta                                                 | 10090 |         |
| 16982809 |     | li6  | Immune          | Immune system, dendritic cells                        | 9606  |         |
| 16990182 |     | 1013 | Cardiovascular  | Endothelium, endothelial cells, umbilical vein, HUVEC | 9606  |         |
| 16997883 |     | li33 | Lung            | Lung, epithelial cells, primary                       | 9606  | GSE3306 |
| 16997903 |     | li12 | Liver           | Liver                                                 | 10116 |         |
| 16999734 |     | li36 | Uterus          | Uterus                                                | 10090 |         |
| 17000718 |     | li12 | Liver           | Liver                                                 | 10116 |         |
| 17000718 |     | li34 | Liver           | Liver                                                 | 10116 |         |
| 17005392 |     | li36 | CNS             | CNS, pituitary                                        | 10116 |         |

|          |         |                |                                               |       |         |
|----------|---------|----------------|-----------------------------------------------|-------|---------|
| 17010207 | 787     | Uterus         | Uterus                                        | 10116 |         |
| 17010207 | 889     | Uterus         | Uterus                                        | 10116 |         |
| 17010207 | 1013    | Uterus         | Uterus                                        | 10116 |         |
| 17010207 | li36    | Uterus         | Uterus                                        | 10116 |         |
| 17010207 | li43    | Uterus         | Uterus                                        | 10116 |         |
| 17010675 | li63    | Prostate       | Prostate, prostatic carcinoma cells, LNCaP    | 9606  | GSE5508 |
| 17011747 | li43    | Uterus         | Uterus                                        | 10116 |         |
| 17013392 | li36    | Breast         | Mammary gland, mammary carcinoma cells, MCF-7 | 9606  |         |
| 17021036 | 2F1     | CNS            | CNS, brain, whole                             | 10090 |         |
| 17023530 | li40    | Lung           | Lung, squamos carcinoma cells, PC-1           | 10090 |         |
| 17031537 | 795     | Liver          | Liver, hepatocytes, primary                   | 10116 |         |
| 17031537 | 1121    | Liver          | Liver, hepatocytes, primary                   | 10116 |         |
| 17031537 | 1141    | Liver          | Liver, hepatocytes, primary                   | 10116 |         |
| 17031537 | JTT-501 | Liver          | Liver, hepatocytes, primary                   | 10116 |         |
| 17031537 | li6     | Liver          | Liver, hepatocytes, primary                   | 10116 |         |
| 17032502 | 1121    | Ovary          | Ovary, ovarian carcinoma cells, A2780         | 9606  |         |
| 17032503 | li36    | Prostate       | Prostate cancer xenografts                    | 10090 |         |
| 17032748 | li35    | Fat            | Adipose tissue, preadipocytes                 | 9606  |         |
| 17038671 | 4A2     | CNS            | CNS, neural stem cells                        | 10116 | GSE3571 |
| 17044078 | li61    | Prostate       | Prostate, prostatic carcinoma cells, LNCaP    | 9606  |         |
| 17045167 | li25    | Thyroid        | Thyroid gland, thyroid carcinoma cells, ARO   | 9606  |         |
| 17052904 | li36    | Breast         | Mammary gland, mammary carcinoma cells, MCF-7 | 9606  |         |
| 17065154 | li23    | Liver          | Liver                                         | 10116 |         |
| 17094431 | 1059    | Prostate       | Prostate, prostatic carcinoma cells, LNCaP    | 9606  |         |
| 17094431 | li40    | Prostate       | Prostate, prostatic carcinoma cells, LNCaP    | 9606  | GSE3627 |
| 17095510 | li33    | Skin           | Skin, keratinocytes, primary                  | 9606  |         |
| 17108234 | 1071    | Liver          | Liver                                         | 10116 |         |
| 17115413 | li27    | Cardiovascular | Artery, coronary, smooth muscle cells         | 9606  |         |
| 17118139 | 1005    | Liver          | Liver, hepatocytes, primary                   | 10090 |         |
| 17118139 | 1029    | Liver          | Liver, hepatocytes, primary                   | 10090 |         |
| 17118139 | li38    | Liver          | Liver, hepatocytes, primary                   | 10090 |         |
| 17118492 | li52    | CNS            | CNS, brain, whole                             | 10090 |         |
| 17121429 | li36    | Breast         | Mammary gland, mammary carcinoma cells, MCF-7 | 9606  |         |
| 17122083 | 1C3     | Bone           | Bone, marrow stromal cells, UAMS-33           | 9606  |         |
| 17127748 | li45    | Ovary          | Ovary                                         | 10116 |         |
| 17170212 | li36    | Uterus         | Uterus                                        | 10116 |         |
| 17170212 | li45    | Uterus         | Uterus                                        | 10116 |         |
| 17171500 | li27    | Cardiovascular | Aorta, vascular smooth muscle cells           | 9913  |         |
| 17174935 | li36    | Breast         | Mammary gland                                 | 10090 |         |
| 17178894 | 789     | Breast         | Mammary gland, mammary carcinoma cells, MCF-7 | 9606  |         |
| 17178894 | li9     | Breast         | Mammary gland, mammary carcinoma cells, MCF-7 | 9606  |         |
| 17178900 | 867     | Breast         | Mammary gland, epithelial cells, normal       | 9606  |         |

|          |      |      |                  |                                                    |       |         |
|----------|------|------|------------------|----------------------------------------------------|-------|---------|
| 17213369 |      | li27 | Muscle           | Muscle, smooth, primary bronchial cells            | 9606  |         |
| 17214554 | 2A1  |      | Pancreas         | Pancreas, beta cells, INS1                         | 10116 |         |
| 17214978 |      | li48 | Gastrointestinal | Intestine                                          | 8355  |         |
| 17218380 |      | 1033 | Cardiovascular   | Blood, leukemia, monocytes, primary                | 9606  |         |
| 17239240 | 1B1  | li25 | Cardiovascular   | Blood, leukemia, acute promyelocytic cells, HL-60  | 9606  |         |
| 17242213 | 3C1  | li57 | Bone             | Bone, osteosarcoma cells, U2OS                     | 9606  |         |
| 17244764 | 3C4  |      | Testis           | Testis, Sertoli cells                              | 10090 |         |
| 17251523 |      | li45 | Uterus           | Uterus                                             | 10090 |         |
| 17254854 |      | li36 | Bone             | Bone, osteoblast cells, hFOB                       | 9606  |         |
| 17254854 |      | li40 | Bone             | Bone, osteoblast cells, hFOB                       | 9606  |         |
| 17255113 |      | 1029 | Liver            | Liver, hepatocytes                                 | 10116 |         |
| 17262801 | 3C4  |      | Prostate         | Prostate, epithelial cells, pRNS-1-1               | 9606  |         |
| 17263875 |      | li63 | Prostate         | Prostate, prostatic carcinoma cells, DU145         | 9606  |         |
| 17263875 |      | li63 | Prostate         | Prostate, prostatic carcinoma cells, LNCaP         | 9606  | GSE5345 |
| 17263875 |      | li63 | Prostate         | Prostate, prostatic carcinoma cells, PC-3          | 9606  |         |
| 17273735 |      | li52 | Skin             | Skin, keratinocytes, HaCaT                         | 9606  |         |
| 17275288 | 1I1  |      | Cardiovascular   | Heart                                              | 10090 |         |
| 17275934 |      | 1071 | Liver            | Liver, hepatocytes                                 | 8022  |         |
| 17295923 |      | li33 | Bone             | Bone, primary osteoblasts                          | 9606  |         |
| 17297473 |      | li63 | Prostate         | Prostate, prostatic carcinoma cells, LNCaP         | 9606  |         |
| 17311081 |      | li40 | CNS              | CNS, cortex, periinfarct                           | 10116 |         |
| 17344426 |      | li41 | Kidney           | Kidney, distal nephron                             | 10090 |         |
| 17351261 |      | 1071 | Uterus           | Uterus                                             | 10116 |         |
| 17360330 |      | li36 | Breast           | Mammary gland, mammary carcinoma cells, MCF-7      | 9606  |         |
| 17372612 | C110 |      | Ovary            | Ovary, ovarian carcinoma, epithelial cells Ho-8910 | 9606  |         |
| 17375196 | 3C1  |      | CNS              | CNS, cerebrum                                      | 10090 |         |
| 17392486 |      | li43 | Mullerian duct   | Mullerian duct                                     | 10090 |         |
| 17394237 |      | li43 | Uterus           | Uterus                                             | 10090 | GSE5825 |
| 17394463 | 4A2  |      | CNS              | CNS, ventral midbrain                              | 10090 |         |
| 17395409 |      | li36 | Breast           | Mammary gland, mammary carcinoma cells, ZR-75.1    | 9606  |         |
| 17395409 |      | li47 | Breast           | Mammary gland, mammary carcinoma cells, ZR-75.1    | 9606  |         |
| 17395409 |      | li56 | Breast           | Mammary gland, mammary carcinoma cells, ZR-75.1    | 9606  |         |
| 17395409 |      | li9  | Breast           | Mammary gland, mammary carcinoma cells, ZR-75.1    | 9606  |         |
| 17403778 | 2A1  |      | Pancreas         | Pancreas, beta cells                               | 10090 |         |
| 17411393 |      | 1005 | Liver            | Liver, hepatocytes, primary                        | 10090 |         |
| 17411393 |      | 1029 | Liver            | Liver, hepatocytes, primary                        | 10090 |         |
| 17411393 |      | li38 | Liver            | Liver, hepatocytes, primary                        | 10090 |         |
| 17426115 | 1C1  |      | Gastrointestinal | Intestine, small                                   | 10090 |         |
| 17426117 | 3C4  | li40 | Prostate         | Prostate, prostatic carcinoma cells, LNCaP         | 9606  | GSE7585 |
| 17428314 | 3A2  |      | Breast           | Mammary gland, mammary carcinoma cells, T47D       | 9606  |         |
| 17430248 |      | 1031 | CNS              | CNS, hippocampus                                   | 10090 |         |
| 17440010 |      | 1077 | Muscle           | Muscle, skeletal muscle                            | 9606  |         |

|          |     |      |                  |                                                    |       |         |
|----------|-----|------|------------------|----------------------------------------------------|-------|---------|
| 17443786 |     | li36 | CNS              | CNS, medial preoptic area                          | 10116 |         |
| 17456854 |     | li6  | Fat              | Adipose tissue, mitochondria                       | 10090 |         |
| 17475347 |     | 1071 | Others           | Gonads                                             | 7955  |         |
| 17475478 |     | li36 | Breast           | Mammary gland, mammary carcinoma cells, T47D       | 9606  |         |
| 17486082 | C36 |      | Breast           | Mammary gland                                      | 10090 |         |
| 17488637 | 3B1 |      | Cardiovascular   | Heart                                              | 10090 |         |
| 17488637 | 3B3 |      | Cardiovascular   | Heart                                              | 10090 |         |
| 17491024 | 3A1 |      | Bone             | Bone, tibia                                        | 10090 |         |
| 17496926 | 3C1 |      | Lung             | Lung, small cell carcinoma cells, DMS79            | 9606  |         |
| 17499901 |     | li33 | Cardiovascular   | Blood, RAW264.7 macrophages                        | 10090 |         |
| 17503021 |     | li6  | Liver            | Liver                                              | 10116 |         |
| 17510434 |     | li36 | Breast           | Mammary gland, mammary carcinoma cells, MCF-7      | 9606  |         |
| 17515612 |     | li36 | Breast           | Mammary gland, mammary carcinoma cells, MCF-7      | 9606  |         |
| 17515958 |     | li36 | Breast           | Mammary gland, mammary carcinoma cells, MCF-7      | 9606  |         |
| 17516158 |     | li24 | Liver            | Liver                                              | 10090 |         |
| 17517334 |     | li29 | Others           | Larva                                              | 7227  |         |
| 17520659 | 3A1 | li36 | Breast           | Mammary gland, mammary carcinoma cells, Hs578T     | 9606  |         |
| 17520659 | 3A2 | li36 | Breast           | Mammary gland, mammary carcinoma cells, Hs578T     | 9606  |         |
| 17520659 |     | li47 | Breast           | Mammary gland, mammary carcinoma cells, Hs578T     | 9606  |         |
| 17520659 |     | li47 | Breast           | Mammary gland, mammary carcinoma cells, Hs578T     | 9606  |         |
| 17522070 |     | 1097 | Liver            | Liver                                              | 10116 |         |
| 17522070 |     | li33 | Liver            | Liver                                              | 10116 |         |
| 17522070 |     | li36 | Liver            | Liver                                              | 10116 |         |
| 17532580 |     | li48 | Liver            | Liver, hepatocyte cells AML12                      | 10090 |         |
| 17535992 | 3C1 |      | Bone             | Bone, osteosarcoma cells, U2OS                     | 9606  |         |
| 17547532 |     | li27 | Bone             | Bone marrow stromal cells, multipotential          | 9606  |         |
| 17550982 |     | li36 | Breast           | Mammary gland, mammary carcinoma cells, MCF-7      | 9606  |         |
| 17550982 |     | li36 | Breast           | Mammary gland, mammary carcinoma cells, MDA-MB-321 | 9606  |         |
| 17553164 |     | li40 | Prostate         | Prostate, prostatic carcinoma cells, LNCaP         | 9606  |         |
| 17555559 |     | 1071 | Liver            | Liver                                              | 8022  |         |
| 17555576 |     | 789  | Uterus           | Uterus                                             | 10090 |         |
| 17555576 |     | 1071 | Uterus           | Uterus                                             | 10090 |         |
| 17556502 | C90 | li45 | Uterus           | Uterus                                             | 10090 |         |
| 17559929 |     | li33 | Placenta         | Placenta                                           | 10090 |         |
| 17560084 |     | li40 | Skin             | Skin, dermal papilla cells                         | 9606  |         |
| 17560561 |     | li25 | Others           | Germ cells, embryonic                              | 10090 |         |
| 17560561 |     | li25 | Stem cells       | Stem cells, embryonic                              | 10090 |         |
| 17565986 |     | li6  | Gastrointestinal | Intestine, colon carcinoma cells, MOSER            | 9606  |         |
| 17566103 |     | li40 | Prostate         | Prostate, prostatic carcinoma cells, LNCaP         | 9606  | GSE7708 |
| 17566103 |     | li61 | Prostate         | Prostate, prostatic carcinoma cells, LNCaP         | 9606  | GSE7708 |
| 17569031 |     | 1141 | Immune           | Immune system, spleen                              | 10090 |         |
| 17584828 |     | li57 | Endometrium      | Endometrium                                        | 9606  |         |



|          |      |      |                |                                                    |       |           |
|----------|------|------|----------------|----------------------------------------------------|-------|-----------|
| 17592025 |      | 851  | Cardiovascular | Blood, peripheral mononuclear cells                | 10116 |           |
| 17592025 |      | 961  | Cardiovascular | Blood, peripheral mononuclear cells                | 10116 |           |
| 17592025 |      | li36 | Cardiovascular | Blood, peripheral mononuclear cells                | 10116 |           |
| 17593529 | 3A1  | li36 | Bone           | Bone, osteosarcoma cells, U2OS                     | 9606  |           |
| 17593529 | 3A2  | li36 | Bone           | Bone, osteosarcoma cells, U2OS                     | 9606  |           |
| 17593529 | 3A1  | li36 | Breast         | Mammary gland, mammary carcinoma cells, MDA-MB-321 | 9606  |           |
| 17593529 | 3A2  | li36 | Breast         | Mammary gland, mammary carcinoma cells, MDA-MB-321 | 9606  |           |
| 17601882 |      | li48 | CNS            | CNS, cerebellum, primary cerebellar neurons        | 10090 |           |
| 17603917 |      | li33 | Bone           | Cartilage, chondrocytes, growth plate, embryonic   | 10090 |           |
| 17606305 |      | 1071 | Liver          | Liver                                              | 7955  |           |
| 17618853 | 3B3  |      | Cardiovascular | Heart                                              | 10090 |           |
| 17628011 |      | li30 | Liver          | Liver, hepatocytes, primary                        | 9606  |           |
| 17628011 |      | li30 | Liver          | Liver, hepatocytes, primary                        | 10116 |           |
| 17639046 |      | li6  | Breast         | Mammary gland, mammary carcinoma cells, MDA-MB-321 | 9606  |           |
| 17640171 |      | 1013 | Breast         | Mammary gland, mammary carcinoma cells, HCC1395    | 9606  |           |
| 17645690 |      | li52 | Cardiovascular | Blood, peripheral mononuclear cells                | 9606  |           |
| 17646210 | C110 | li6  | Fat            | Adipose tissue, adipocytes, primary                | 9606  | GSE5184.  |
| 17652031 |      | 1077 | Cardiovascular | Artery, mesenteric                                 | 10116 |           |
| 17652031 |      | li36 | Cardiovascular | Artery, mesenteric                                 | 10116 |           |
| 17655910 |      | li48 | Eye            | Eye, retinoblastoma cells, WERI-Rb1                | 9606  |           |
| 17664351 | 1C3  | 969  | Immune         | Immune system, dendritic cells                     | 9606  | GSE8658   |
| 17664351 | 1C3  | li20 | Immune         | Immune system, dendritic cells                     | 9606  | GSE8658   |
| 17664351 | 1C3  | li6  | Immune         | Immune system, dendritic cells                     | 9606  | GSE8658   |
| 17666523 | 1F1  |      | Liver          | Liver                                              | 10090 |           |
| 17666523 | 1F3  |      | Liver          | Liver                                              | 10090 |           |
| 17668254 |      | li36 | Breast         | Mammary gland                                      | 9913  |           |
| 17671682 |      | li47 | Breast         | Mammary gland, mammary carcinoma cells, MCF-7      | 9606  |           |
| 17673513 | 3A1  | li36 | Testis         | Testis                                             | 10090 |           |
| 17673513 |      | li43 | Testis         | Testis                                             | 10090 |           |
| 17675804 |      | li36 | Breast         | Mammary gland                                      | 10090 | GSM159919 |
| 17675804 |      | li36 | Uterus         | Uterus                                             | 10090 | GSM159919 |
| 17675804 |      | li36 | Vagina         | Vagina                                             | 10090 | GSM159919 |
| 17675858 |      | li48 | Liver          | Liver                                              | 9031  |           |
| 17679089 |      | li40 | Prostate       | Prostate, prostatic carcinoma cells, LNCaP         | 9606  | GSE7868   |
| 17682054 |      | li33 | Bone           | Bone, osteosarcoma cells, U2OS                     | 9606  | GSE6711   |
| 17687191 |      | 833  | Kidney         | Kidney, As4.1 juxtaglomerular cells                | 10090 |           |
| 17687646 |      | 1013 | Breast         | Mammary gland, mammary carcinoma cells, MCF-7      | 9606  |           |
| 17698303 |      | 805  | Testis         | Testis                                             | 10116 |           |
| 17699665 | 3C1  |      | CNS            | CNS, hippocampus                                   | 10090 |           |
| 17700529 | 3A1  | li36 | Breast         | Mammary gland, mammary carcinoma cells, T47D       | 9606  |           |
| 17700529 | 3A2  | li36 | Breast         | Mammary gland, mammary carcinoma cells, T47D       | 9606  |           |
| 17702527 |      | 835  | Liver          | Liver, hepatocyte cells, TAMH                      | 10090 |           |

|          |      |      |                |                                                 |       |
|----------|------|------|----------------|-------------------------------------------------|-------|
| 17706260 |      | 789  | Liver          | Liver                                           | 10116 |
| 17707340 |      | 799  | Liver          | Liver, hepatocellular carcinoma cells, HepG2    | 9606  |
| 17707340 |      | 799  | Liver          | Liver, hepatoma cells, HuH-7                    | 9606  |
| 17707340 |      | li44 | Liver          | Liver, hepatocellular carcinoma cells, HepG2    | 9606  |
| 17707340 |      | li44 | Liver          | Liver, hepatoma cells, HuH-7                    | 9606  |
| 17715259 |      | 833  | Kidney         | Kidney, As4.1 juxtaglomerular cells             | 10090 |
| 17716978 | 3A1  | li36 | Cervix         | Cervix, cervical carcinoma cells, HeLa          | 9606  |
| 17766684 |      | 1111 | Endometrium    | Endometrium, stromal cells                      | 9606  |
| 17766684 |      | 1111 | Others         | Glandular epithelial cells                      | 9606  |
| 17766684 |      | li36 | Endometrium    | Endometrium, stromal cells                      | 9606  |
| 17766684 |      | li36 | Others         | Glandular epithelial cells                      | 9606  |
| 17823450 |      | 789  | Liver          | Liver                                           | 8022  |
| 17823450 |      | 1059 | Liver          | Liver                                           | 8022  |
| 17823450 |      | li35 | Liver          | Liver                                           | 8022  |
| 17823450 |      | li36 | Liver          | Liver                                           | 8022  |
| 17823450 |      | li40 | Liver          | Liver                                           | 8022  |
| 17823450 |      | li43 | Liver          | Liver                                           | 8022  |
| 17848605 |      | li35 | Liver          | Liver, hepatocytes, primary                     | 8022  |
| 17848605 |      | li57 | Liver          | Liver, hepatocytes, primary                     | 8022  |
| 17880687 | C102 | li25 |                | Embryonal carcinoma cells, NT2/D1               | 9606  |
| 17888866 |      | li28 | Liver          | Liver, hepatocytes, primary                     | 9606  |
| 17888866 |      | li34 | Liver          | Liver, hepatocytes, primary                     | 9606  |
| 17901120 | 3C1  |      | Lung           | Lung                                            | 10090 |
| 17901129 | 3A1  |      | Liver          | Liver                                           | 10090 |
| 17909947 |      | li48 | CNS            | CNS, brain, whole                               | 10116 |
| 17913923 |      | li24 | CNS            | CNS, neuroblastoma cells, SH-SY5Y               | 9606  |
| 17922837 |      | 827  | Kidney         | Kidney, embryonic kidney cells, HEK293          | 9606  |
| 17922837 |      | 1049 | Kidney         | Kidney, embryonic kidney cells, HEK293          | 9606  |
| 17932503 |      | li63 | Prostate       | Prostate, prostatic carcinoma cells, LNCaP      | 9606  |
| 17935973 | 3C1  |      | Skin           | Skin                                            | 10090 |
| 17942703 |      | 833  | Cardiovascular | Heart, cardiac left ventricle                   | 10116 |
| 17942748 |      | 1071 | Uterus         | Uterus                                          | 10090 |
| 17950954 |      | li36 | CNS            | CNS, hippocampus                                | 10090 |
| 17962213 |      | li36 | Uterus         | Uterus                                          | 9544  |
| 17962213 |      | li45 | Uterus         | Uterus                                          | 9544  |
| 17962383 |      | li36 | Bone           | Bone, primary osteoblasts                       | 9606  |
| 17963725 |      | 795  | Fat            | Adipose tissue, preadipocytes, 3T3-L1           | 10090 |
| 17963725 |      | 1141 | Fat            | Adipose tissue, preadipocytes, 3T3-L1           | 10090 |
| 17963725 |      | li6  | Fat            | Adipose tissue, preadipocytes, 3T3-L1           | 10090 |
| 17982697 |      | li36 | Breast         | Mammary gland, mammary carcinoma cells, MCF-10F | 9606  |
| 17984292 |      | 1037 | Liver          | Liver                                           | 10116 |
| 17984292 |      | 1071 | Liver          | Liver                                           | 10116 |

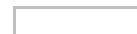

|          |     |      |                   |                                                       |       |          |
|----------|-----|------|-------------------|-------------------------------------------------------|-------|----------|
| 17986456 |     | li36 | Breast            | Mammary gland, mammary carcinoma cells, MCF-7         | 9606  |          |
| 17989729 |     | li35 | Others            | Keloid fibroblasts                                    | 9606  |          |
| 17997058 |     | li36 | Vagina            | Vagina                                                | 9606  |          |
| 17998272 |     | li33 | Immune            | Immune system, thymus                                 | 10090 |          |
| 17998272 |     | li36 | Immune            | Immune system, thymus                                 | 10090 |          |
| 18000226 |     | 789  | Endometrium       | Endometrium, endometrial carcinoma cells, ECC-1       | 9606  |          |
| 18000226 |     | li36 | Endometrium       | Endometrium, endometrial carcinoma cells, ECC-1       | 9606  |          |
| 18005342 |     | li48 | CNS               | CNS, cerebellum                                       | 10090 |          |
| 18006250 |     | li25 | Liver             | Liver, hepatocyte cells AML12                         | 10090 |          |
| 18007998 |     | li40 | Prostate          | Prostate, prostatic carcinoma cells, LNCaP            | 9606  |          |
| 18024792 | 1B1 |      | Cardiovascular    | Blood, leukemia, monocyte lymphoma cells, U937        | 9606  |          |
| 18037150 |     | li45 | Endometrium       | Endometrium, endometrial carcinoma cells, Ishikawa H  | 9606  |          |
| 18045478 |     | 797  | Immune            | Immune system, T-cells                                | 9606  |          |
| 18045478 |     | li33 | Immune            | Immune system, T-cells                                | 9606  |          |
| 18054352 |     | li3  | Endometrium       | Endometrium                                           | 10116 |          |
| 18077316 |     | 1111 | Endometrium       | Endometrium                                           | 9606  |          |
| 18077316 |     | 1111 | Uterus            | Uterus, myometrium                                    | 9606  |          |
| 18077316 |     | li36 | Endometrium       | Endometrium                                           | 9606  |          |
| 18077316 |     | li36 | Uterus            | Uterus, myometrium                                    | 9606  |          |
| 18077318 |     | li36 | Endometrium       | Endometrium                                           | 9606  |          |
| 18077318 |     | li45 | Endometrium       | Endometrium                                           | 9606  |          |
| 18083300 |     | li36 | CNS               | CNS, hypothalamus                                     | 7957  |          |
| 18097065 |     | li36 | Bone              | Bone, osteosarcoma cells, U2OS                        | 9606  |          |
| 18154422 |     | 1097 |                   | Embryonal carcinoma cells, P19CL6                     | 10090 |          |
| 18156210 | C92 |      | Prostate          | Prostate, prostatic carcinoma cells, LNCaP            | 9606  |          |
| 18164278 | 1B3 | li25 |                   | Embryonal carcinoma cells, F9                         | 10090 | GSE8431  |
| 18174242 |     | li36 | Liver             | Liver                                                 | 10116 |          |
| 18180321 |     | BPA  | Breast            | Mammary gland                                         | 10116 |          |
| 18223235 |     | 867  | Thyroid           | Thyroid gland, thyroid carcinoma anaplastic cells DRO | 9606  |          |
| 18246545 |     | 783  | Liver             | Liver, hepatocytes, primary                           | 10116 |          |
| 18246545 |     | 1009 | Liver             | Liver, hepatocytes, primary                           | 10116 |          |
| 18246545 |     | 1097 | Liver             | Liver, hepatocytes, primary                           | 10116 |          |
| 18247161 |     | li36 | CNS               | CNS, amygdala                                         | 10090 |          |
| 18253720 |     | 1029 | Liver             | Liver                                                 | 10116 |          |
| 18258689 |     | 1013 | Breast            | Mammary gland, mammary carcinoma cells, MCF-7         | 9606  | GSE9936  |
| 18258689 |     | li36 | Breast            | Mammary gland, mammary carcinoma cells, MCF-7         | 9606  | GSE9936  |
| 18260696 |     | li36 | Breast            | Mammary gland, mammary carcinoma cells, MCF-7         | 9606  |          |
| 18261244 |     | li34 | Liver             | Liver                                                 | 10090 | GSE6271  |
| 18272184 |     | li33 | Pluripotent cells | D1 pluripotent mesenchymal cells                      | 10090 |          |
| 18272478 | 3A1 | li36 | Breast            | Mammary gland, mammary carcinoma cells, MCF-7         | 9606  |          |
| 18272478 | 3A2 |      | Breast            | Mammary gland, mammary carcinoma cells, MCF-7         | 9606  |          |
| 18276827 | 2A1 |      | Liver             | Liver                                                 | 10090 | GSE10390 |

|          |         |      |                  |                                                        |       |          |
|----------|---------|------|------------------|--------------------------------------------------------|-------|----------|
| 18295443 |         | 1013 | Lung             | Lung, adenocarcinoma cells, SPC-A-1                    | 9606  |          |
| 18310284 |         | li36 | Breast           | Mammary gland, mammary carcinoma cells, MCF-7          | 9606  |          |
| 18337509 | 1C2     | 969  | Cardiovascular   | Aorta                                                  | 10090 |          |
| 18370844 |         | li6  | Fat              | Adipose tissue, WAT                                    | 10116 |          |
| 18381591 |         | li33 | Breast           | Mammary gland, mammary carcinoma cells, MCF-7          | 9606  | GSE8383  |
| 18381591 |         | li36 | Breast           | Mammary gland, mammary carcinoma cells, MCF-7          | 9606  | GSE8383  |
| 18387200 |         | li36 | Breast           | Mammary gland, mammary carcinoma cells, ZR-75.1        | 9606  |          |
| 18388116 |         | 795  | Kidney           | Kidney, renal cortex                                   | 10116 |          |
| 18388195 |         | li36 | CNS              | CNS, neurons, neonatal, T8-L4DRG                       | 10116 |          |
| 18390925 | 3C4     | 1077 | Muscle           | Muscle, gastrocnemius                                  | 10090 |          |
| 18391702 |         | 841  | Cardiovascular   | Blood, lymphocytes, pre-B acute lymphoblastic leukemia | 9606  |          |
| 18434135 |         | 789  | Endometrium      | Endometrium                                            | 9606  |          |
| 18434135 |         | li36 | Endometrium      | Endometrium                                            | 9606  |          |
| 18434428 | 3A2     | li36 | Breast           | Mammary gland, mammary carcinoma cells, MDA-MB-321     | 9606  | GSE9761  |
| 18436814 |         | li36 | Eye              | Eye, meibomian gland                                   | 10090 | GSE5783  |
| 18436814 |         | li45 | Eye              | Eye, meibomian gland                                   | 10090 | GSE5783  |
| 18444173 |         | 1013 | Breast           | Mammary gland, mammary carcinoma cells, MDA-MB-435S    | 9606  |          |
| 18464259 | 3A2     | li36 | Gastrointestinal | Intestine, colonocytes                                 | 10090 |          |
| 18467437 |         | li48 | CNS              | CNS, striatum                                          | 10116 |          |
| 18467542 |         | li6  | Fat              | Adipose tissue                                         | 10090 |          |
| 18489901 | 1C3     |      | Fat              | Adipose tissue, preadipocytes, 3T3-L1                  | 10090 |          |
| 18495684 |         | li9  | Testis           | Testis, efferent ductules                              | 10116 |          |
| 18501443 | C110    |      | Fat              | Adipose tissue, preadipocytes                          | 9606  |          |
| 18511503 | 3C3     | 1111 | Endometrium      | Endometrium, primary endometrial cells                 | 9606  |          |
| 18511503 | 3C4     | 1111 | Endometrium      | Endometrium, primary endometrial cells                 | 9606  |          |
| 18537133 |         | li36 | Uterus           | Uterus                                                 | 10090 |          |
| 18555785 | 3B2 C54 |      | Stem cells       | Stem cells, embryonic                                  | 10090 | GSE11431 |
| 18556351 |         | li36 | Breast           | Mammary gland                                          | 10090 | GSE5483  |
| 18556351 |         | li45 | Breast           | Mammary gland                                          | 10090 | GSE5483  |
| 18559539 |         | li36 | Breast           | Mammary gland, mammary carcinoma cells, MCF-7          | 9606  | GSE10911 |
| 18562193 |         | li36 | Cardiovascular   | Endothelium, endothelial cells, umbilical vein, HUVEC  | 9606  |          |
| 18583417 |         | li6  | PNS              | Nervous system, peripheral, sciatic nerve              | 10090 | GSE11343 |
| 18591936 | 0B1     |      |                  | Ewing's tumor cells, A673                              | 9606  |          |
| 18617595 |         | li36 | Breast           | Mammary gland, mammary carcinoma cells, MCF-7          | 9606  | GSE15717 |
| 18627025 |         | li36 | Uterus           | Uterus, myometrium                                     | 10116 | GSE9117  |
| 18631401 | 3A1     |      | Breast           | Mammary gland, mammary carcinoma cells, MCF-7          | 9606  | GSE10061 |
| 18632874 |         | li36 | Uterus           | Uterus                                                 | 10090 |          |
| 18632874 |         | li56 | Uterus           | Uterus                                                 | 10090 |          |
| 18632874 |         | li9  | Uterus           | Uterus                                                 | 10090 |          |
| 18655706 |         | li36 | Breast           | Mammary gland, mammary carcinoma cells, MCF-7          | 9606  |          |
| 18662769 |         | 887  | Liver            | Liver, hepatocellular carcinoma cells, HepG2           | 9606  |          |
| 18668525 |         | 1085 | Prostate         | Prostate, prostatic carcinoma cells, DU145             | 9606  |          |

|          |      |      |                  |                                                      |       |                 |
|----------|------|------|------------------|------------------------------------------------------|-------|-----------------|
| 18668525 |      | 1085 | Prostate         | Prostate, prostatic carcinoma cells, LNCaP           | 9606  |                 |
| 18677558 |      | li36 | Breast           | Mammary gland, mammary carcinoma cells, MCF-7        | 9606  | GSE10911        |
| 18680712 | C269 |      | Liver            | Liver, hepatocytes, primary                          | 10090 | GSE9523         |
| 18687774 |      | li45 | Breast           | Mammary gland                                        | 10090 | GSE10290        |
| 18688264 |      | 1141 | Urinary tract    | Urinary tract, urothelial cells, NHU                 | 9606  |                 |
| 18692832 |      | li36 | Uterus           | Uterus, microvascular endothelial cells              | 9606  |                 |
| 18692832 |      | li45 | Uterus           | Uterus, microvascular endothelial cells              | 9606  |                 |
| 18703560 |      | li25 | Others           | Forelimb, embryonal                                  | 10090 |                 |
| 18704457 |      | 1141 | Gastrointestinal | Intestine, colorectal carcinoma cells, HCT116        | 9606  |                 |
| 18712722 |      | li6  | Cardiovascular   | Bladder, epithelial cells                            | 10116 |                 |
| 18717759 |      | li48 | Liver            | Liver                                                | 10116 |                 |
| 18718169 |      | li33 | Bone             | Bone, dental follicle cells                          | 9606  |                 |
| 18728228 |      | li40 | Fat              | Adipose tissue                                       | 10090 | GSE9631         |
| 18755030 | 2B1  |      | Liver            | Liver                                                | 10090 |                 |
| 18755275 |      | li6  | CNS              | CNS, neuroblastoma cells, LAN-5                      | 9606  |                 |
| 18757549 |      | 961  | Liver            | Liver                                                | 10090 |                 |
| 18757549 |      | li36 | Liver            | Liver                                                | 10090 |                 |
| 18769122 |      | 1017 | Kidney           | Kidney, renal carcinoma cells                        | 9606  |                 |
| 18772582 |      | li36 | CNS              | CNS, glial cells                                     | 9606  | GSE10097        |
| 18772582 |      | li36 | CNS              | CNS, neurons                                         | 9606  | GSE10097        |
| 18776219 | 0B2  |      | Liver            | Liver                                                | 10090 |                 |
| 18787029 |      | 1005 | CNS              | CNS, hypothalamus                                    | 10090 | GSE10417        |
| 18791161 |      | li36 | Immune           | Immune system. spleen, lymphocytes                   | 10090 | GSE11197        |
| 18794125 | 3A1  | li36 | Breast           | Mammary gland, mammary carcinoma cells, MCF-7        | 9606  |                 |
| 18810563 |      | 1077 | Testis           | Testis, Sertoli cells TM4                            | 10090 |                 |
| 18818283 | 3A1  | li36 | Bone             | Bone, osteosarcoma cells, U2OS-ER $\alpha$           | 9606  |                 |
| 18818283 | 3A1  | li36 | Breast           | Mammary gland, mammary carcinoma cells, MCF-7        | 9606  |                 |
| 18831789 |      | li36 | Breast           | Mammary gland, mammary carcinoma cells, MCF-7        | 9606  |                 |
| 18838536 | 3A1  | li36 | Breast           | Mammary gland, mammary carcinoma cells, MCF-7        | 9606  |                 |
| 18838540 | 3C1  | li33 | Bone             | Bone, osteosarcoma cells, U2OS                       | 9606  | <b>GSE11205</b> |
| 18839023 |      | li25 | CNS              | CNS, astrocytoma cells, SHG-44                       | 9606  |                 |
| 18847459 |      | 1013 | CNS              | CNS, glioblastoma cells, primary                     | 9606  |                 |
| 18847459 |      | 1013 |                  | Embryonal carcinoma cells, NCCIT                     | 9606  |                 |
| 18847459 |      | 1013 | Liver            | Liver, hepatocellular carcinoma cells, HCC-M         | 9606  |                 |
| 18847459 |      | 1013 |                  | Rhabdomyosarcoma cells, primary                      | 9606  |                 |
| 18847503 |      | li25 | Skin             | Skin, melanoma cells, B16                            | 10090 | GSE11588        |
| 18925944 |      | 1037 | Liver            | Liver                                                | 10090 |                 |
| 18927629 |      | li33 | CNS              | CNS, pituitary, anterior cells, AtT20                | 10090 | GSE19042        |
| 18936297 |      | 1071 | Endometrium      | Endometrium, endometrial carcinoma cells, Ishikawa H | 9606  | GSE11869        |
| 18938255 |      | li36 | CNS              | CNS, hippocampus                                     | 10090 |                 |
| 18945812 | 4A1  |      | Fat              | Adipose tissue, preadipocytes, 3T3-L1                | 10090 |                 |
| 18946176 |      | li36 | CNS              | CNS, hippocampus                                     | 10116 |                 |

|          |          |      |                  |                                                        |       |          |
|----------|----------|------|------------------|--------------------------------------------------------|-------|----------|
| 18948404 |          | li6  | Bone             | Bone, femur                                            | 10090 |          |
| 18949406 |          | li6  | Gastrointestinal | Stomach, gastric cells                                 | 10116 |          |
| 18952783 |          | li36 | Breast           | Mammary gland, mammary carcinoma cells, MCF-7          | 9606  |          |
| 18974123 | 3B1 C110 | li36 | Breast           | Mammary gland, mammary carcinoma cells, MCF-7          | 9606  |          |
| 18975255 |          | 1049 | Breast           | Mammary gland, mammary carcinoma cells, MCF-7          | 9606  |          |
| 18981473 | 1C3      |      | Fat              | Adipose tissue, preadipocytes, 3T3-L1                  | 10090 |          |
| 18981474 | 1C3      |      | Fat              | Adipose tissue, preadipocytes, 3T3-L1                  | 10090 | GSE13511 |
| 18981474 | 2B1      |      | Fat              | Adipose tissue, preadipocytes, 3T3-L1                  | 10090 | GSE13511 |
| 18981474 | 2B2      |      | Fat              | Adipose tissue, preadipocytes, 3T3-L1                  | 10090 | GSE13511 |
| 18981474 | 2B3      |      | Fat              | Adipose tissue, preadipocytes, 3T3-L1                  | 10090 | GSE13511 |
| 18997859 | 3C4      | li40 | Prostate         | Prostate, prostatic carcinoma cells, metastatic, C4-2B | 9606  |          |
| 19006456 |          | li36 | Bone             | Bone, bone marrow stem cells, c-kit+                   | 9606  |          |
| 19006456 |          | li36 | Bone             | Bone, bone marrow stromal cells, CD44+                 | 9606  |          |
| 19013437 |          | li33 | Breast           | Mammary gland, mammary carcinoma cells, T47D           | 9606  |          |
| 19013437 |          | li45 | Breast           | Mammary gland, mammary carcinoma cells, T47D           | 9606  |          |
| 19017814 |          | li43 | Uterus           | Uterus, uterine leiomyomas                             | 9606  |          |
| 19017957 |          | li25 | Cardiovascular   | Blood, eosinphils                                      | 9606  | GSE12926 |
| 19017957 |          | li42 | Cardiovascular   | Blood, eosinphils                                      | 9606  | GSE12926 |
| 19059307 |          | 789  | Bone             | Bone, osteosarcoma cells, U2OS                         | 9606  |          |
| 19059307 | 3A1      | li36 | Bone             | Bone, osteosarcoma cells, U2OS                         | 9606  |          |
| 19059307 | 3A2      | li56 | Bone             | Bone, osteosarcoma cells, U2OS                         | 9606  |          |
| 19059462 |          | li23 | Adrenal          | Adrenal gland, adrenocarcinoma cells, H295R            | 9606  |          |
| 19070637 |          | li36 | CNS              | CNS, neurons, LHRH, GT1-7                              | 9606  |          |
| 19072826 | 1H4      | 1015 | Liver            | Liver, hepatocytes                                     | 10090 |          |
| 19073913 |          | li27 | Gastrointestinal | Intestine, duodenum                                    | 10090 |          |
| 19079622 | 0B2      |      | Fat              | Adipose tissue, preadipocytes, 3T3-L1                  | 10090 |          |
| 19082494 | 3A1      |      | Breast           | Mammary gland, mammary carcinoma cells, MCF-7          | 9606  |          |
| 19084549 |          | li34 | Liver            | Liver, hepatoma cells, HepaRG                          | 9606  |          |
| 19088194 |          | li40 | Prostate         | Prostate, prostatic carcinoma cells, LNCaP             | 9696  |          |
| 19091570 |          | li25 | CNS              | CNS, glioblastoma cells, SHG-44                        | 9606  |          |
| 19092848 |          | li25 | Cardiovascular   | Blood, leukemia, acute promyelocytic cells, HL-60      | 9606  |          |
| 19092848 |          | li27 | Cardiovascular   | Blood, leukemia, acute promyelocytic cells, HL-60      | 9606  |          |
| 19117983 |          | li36 | Breast           | Mammary gland, mammary carcinoma cells, MCF-7          | 9606  |          |
| 19117996 | 3C4      | li63 | Prostate         | Prostate, prostatic carcinoma cells, LNCaP             | 9606  |          |
| 19126649 | C97      | 1009 | Cardiovascular   | Bladder, bladder cancer cells, EJ28 (decreased NCoR)   | 9606  |          |
| 19126649 | C97      | 1009 | Cardiovascular   | Bladder, bladder cancer cells, RT4 (increased NCoR)    | 9606  |          |
| 19136022 | 113      | li34 | Liver            | Liver                                                  | 10090 |          |
| 19136022 |          | li38 | Liver            | Liver                                                  | 10090 |          |
| 19138738 |          | li45 | Endometrium      | Endometrium, endometrial carcinoma cells, Ishikawa H   | 10090 | GSE14713 |
| 19138738 |          | li57 | Endometrium      | Endometrium, endometrial carcinoma cells, Ishikawa H   | 10090 |          |
| 19146866 |          | 1111 | Breast           | Mammary gland, mammary carcinoma cells, MCF-7          | 9606  |          |
| 19146866 |          | li36 | Breast           | Mammary gland, mammary carcinoma cells, MCF-7          | 9606  |          |

|          |     |      |                  |                                                       |           |          |
|----------|-----|------|------------------|-------------------------------------------------------|-----------|----------|
| 19155303 |     | 789  | Breast           | Mammary gland, epithelial cells, normal               | 9606      | GSE13476 |
| 19159669 |     | li34 | Liver            | Liver, hepatoma cells, HepaRG                         | 9606      |          |
| 19167446 |     | 1025 | Breast           | Mammary gland, mammary carcinoma cells, MCF-7         | 9606      |          |
| 19182210 |     | li25 | Cardiovascular   | Blood, acute promyelocytic leukemia cells, NB4        | 9606      |          |
| 19192274 |     | 1033 | Bone             | Cartilage, chondrocytes                               | 9606      | GSE12860 |
| 19222862 |     | li25 | Cardiovascular   | Blood, leukemia, acute promyelocytic cells, HL-60     | 9606      |          |
| 19226348 |     | li36 | CNS              | CNS, diencephalon                                     | 10090     |          |
| 19228888 |     | li48 | Gastrointestinal | Intestine, small                                      | X. laevis |          |
| 19239329 |     | li25 | Cardiovascular   | Blood, leukemia, acute promyelocytic cells, HL-60     | 9606      |          |
| 19240802 | 1A2 | li48 | CNS              | CNS, cerebellum                                       | 10090     |          |
| 19276241 |     | li48 | Muscle           | Muscle, extraocular                                   | 10116     |          |
| 19284886 |     | 1085 | Gastrointestinal | Intestine, small                                      | 10090     | GSE11936 |
| 19284886 |     | li3  | Gastrointestinal | Intestine, small                                      | 10090     | GSE11936 |
| 19293335 |     | 797  | Cardiovascular   | Heart, primary cardiomyocytes                         | 10116     | GSE12752 |
| 19293335 |     | li57 | Cardiovascular   | Heart, primary cardiomyocytes                         | 10116     | GSE12752 |
| 19299443 | 3C3 | li64 | Breast           | Mammary gland, mammary carcinoma cells, T47D          | 9606      |          |
| 19300518 | 1C3 |      | Fat              | Adipose tissue, preadipocytes, 3T3-L1                 | 10090     |          |
| 19300518 | 2B1 |      | Fat              | Adipose tissue, preadipocytes, 3T3-L1                 | 10090     |          |
| 19300518 | 2B2 |      | Fat              | Adipose tissue, preadipocytes, 3T3-L1                 | 10090     |          |
| 19300518 | 2B3 |      | Fat              | Adipose tissue, preadipocytes, 3T3-L1                 | 10090     |          |
| 19302803 |     | li25 | Cardiovascular   | Blood, leukemia, acute promyelocytic cells, HL-60     | 9606      |          |
| 19321454 | 3A1 | li36 | Breast           | Mammary gland, mammary carcinoma cells, MDA-MB-321    | 9606      | GSE9761  |
| 19339991 |     | 789  | Breast           | Mammary gland, mammary carcinoma cells, MCF-7         | 9606      |          |
| 19339991 | 3A1 | li36 | Breast           | Mammary gland, mammary carcinoma cells, MCF-7         | 9606      |          |
| 19339991 |     | li9  | Breast           | Mammary gland, mammary carcinoma cells, MCF-7         | 9606      |          |
| 19342371 | C31 | li36 | Breast           | Mammary gland                                         | 10090     |          |
| 19343000 |     | li36 | Breast           | Mammary gland, mammary carcinoma cells, MCF-7         | 9606      |          |
| 19359405 |     | li12 | Gastrointestinal | Intestine, duodenum                                   | 10090     |          |
| 19364822 | C30 | li36 | Breast           | Mammary gland, mammary carcinoma cells, MCF-7         | 9606      |          |
| 19367084 |     | 835  | Testis           | Testis                                                | 10116     |          |
| 19367084 |     | 1077 | Testis           | Testis                                                | 10116     |          |
| 19372191 |     | li36 | Liver            | Liver                                                 | 10116     |          |
| 19375645 |     | li48 | Cardiovascular   | Blood, erythrocytes                                   | 9606      | GSE7579  |
| 19383543 |     | li64 | Breast           | Mammary gland, epithelial cells, normal               | 10090     |          |
| 19388012 |     | li25 | Skin             | Skin, keratinocytes, primary                          | 9606      |          |
| 19400957 |     | 789  | Uterus           | Uterus                                                | 10116     |          |
| 19400957 |     | 1071 | Uterus           | Uterus                                                | 10116     |          |
| 19414603 | 1C3 |      | Fat              | Adipose tissue, preadipocytes, 3T3-L1                 | 10090     |          |
| 19414603 | 2B1 |      | Fat              | Adipose tissue, preadipocytes, 3T3-L1                 | 10090     |          |
| 19414624 |     | li27 | Gastrointestinal | Intestine, colon carcinoma CaCo-2 cells               | 9606      |          |
| 19426978 |     | li15 | Cardiovascular   | Endothelium, endothelial cells, umbilical vein, HUVEC | 9606      |          |
| 19426978 |     | li24 | Cardiovascular   | Endothelium, endothelial cells, umbilical vein, HUVEC | 9606      |          |

|          |             |                  |                                                 |                                              |          |          |
|----------|-------------|------------------|-------------------------------------------------|----------------------------------------------|----------|----------|
| 19429434 | 789         | Bone             | Bone, osteoblast cells, hFOB                    | 9606                                         |          |          |
| 19429434 | li36        | Bone             | Bone, osteoblast cells, hFOB                    | 9606                                         |          |          |
| 19429434 | li9         | Bone             | Bone, osteoblast cells, hFOB                    | 9606                                         |          |          |
| 19429443 | li40        | CNS              | CNS, hypothalamus                               | 10090                                        |          |          |
| 19430610 | 1013        | Liver            | Liver                                           | 10116                                        |          |          |
| 19438714 | 1A2         | li38             | Cardiovascular                                  | Heart                                        | 10090    |          |
| 19450877 | 1033        | Cardiovascular   | Blood, leukemia, lymphoid cells, CEM            | 9606                                         |          |          |
| 19470764 | 853         | Skin             | Skin, melanoma cells, S91                       | 10090                                        |          |          |
| 19479829 | li25        | Bone             | Cartilage, chondrocytes                         | 9606                                         |          |          |
| 19484750 | li36        | Breast           | Mammary gland                                   | 10090                                        | GSE4647  |          |
| 19488064 | 841         | Cardiovascular   | Blood, peripheral mononuclear cells             | 9606                                         |          |          |
| 19488064 | Deflazacort | Cardiovascular   | Blood, peripheral mononuclear cells             | 9606                                         |          |          |
| 19492420 | 987         | Breast           | Mammary gland, epithelial cells, normal         | 9606                                         |          |          |
| 19492420 | li25        | Breast           | Mammary gland, epithelial cells, normal         | 9606                                         |          |          |
| 19515692 | 4A2         | CNS              | CNS, ventral midbrain                           | 10090                                        |          |          |
| 19553595 | 1077        | Testis           | Testis, caput epididymis                        | 10090                                        |          |          |
| 19553595 | 1077        | Testis           | Testis, epididymis, efferent ducts              | 10090                                        |          |          |
| 19553595 | li36        | Testis           | Testis, caput epididymis                        | 10090                                        |          |          |
| 19553595 | li36        | Testis           | Testis, epididymis, efferent ducts              | 10090                                        |          |          |
| 19555691 | 887         | Breast           | Mammary gland, mammary carcinoma cells, MCF-7   | 9606                                         | GSE15249 |          |
| 19555691 | 1109        | Breast           | Mammary gland, mammary carcinoma cells, MCF-7   | 9606                                         | GSE15249 |          |
| 19555691 | li36        | Breast           | Mammary gland, mammary carcinoma cells, MCF-7   | 9606                                         | GSE15249 |          |
| 19563910 | 1C3         | Breast           | Mammary gland, epithelial cells, normal         | 10090                                        |          |          |
| 19574448 | 3A1         | 1071             | Liver                                           | 10090                                        |          |          |
| 19622763 | 3B1         | Breast           | Mammary gland, mammary carcinoma cells, MCF-7   | 9606                                         |          |          |
| 19622763 | 3B1         | Breast           | Mammary gland, mammary carcinoma cells, SK-BR-3 | 9606                                         |          |          |
| 19623182 | li40        | Ovary            | Ovary, ovarian carcinoma cells, OVCAR3          | 9606                                         |          |          |
| 19668381 | 3C4         | li63             | Prostate                                        | Prostate, prostatic carcinoma cells, PC-3    | 9606     | GSE15091 |
| 19672408 | 1013        | Testis           | Testis                                          | 10090                                        |          |          |
| 19672408 | 1039        | Testis           | Testis                                          | 10090                                        |          |          |
| 19680825 | 3A2         | li36             | Kidney                                          | Kidney, embryonic kidney cells, HEK293       | 9606     |          |
| 19684331 | 835         | Testis           | Testis                                          | 10116                                        |          |          |
| 19684331 | 1077        | Testis           | Testis                                          | 10116                                        |          |          |
| 19691840 | li53        | Liver            | Liver                                           | 10090                                        | GSE13688 |          |
| 19695238 | li34        | Liver            | Liver                                           | 10116                                        |          |          |
| 19698761 | 3A1         | li36             | Breast                                          | Mammary gland, mammary carcinoma cells, T47D | 9606     |          |
| 19706389 | li36        | Breast           | Mammary gland, mammary carcinoma cells, MCF-7   | 9606                                         |          |          |
| 19721697 | 1D1         | Liver            | Liver                                           | 10090                                        |          |          |
| 19761587 | 2A1         | Gastrointestinal | Intestine, colon carcinoma CaCo-2 cells         | 9606                                         | GSE7745  |          |
| 19801529 | 3C1         | li33             | Lung                                            | Lung, epithelial cells, A549                 | 9606     |          |
| 19805343 | li33        | Lung             | Lung, epithelial cells, A549                    | 9606                                         | GSE17307 |          |
| 19805343 | li57        | Lung             | Lung, epithelial cells, A549                    | 9606                                         | GSE17307 |          |



|          |      |      |                  |                                                            |       |          |
|----------|------|------|------------------|------------------------------------------------------------|-------|----------|
| 19863778 |      | li27 | Breast           | Mammary gland, mammary carcinoma cells, MCF-7              | 9606  | GSE9867  |
| 19886770 | 1B1  | li25 | Testis           | Testis                                                     | 10090 | GSE14962 |
| 19888342 | C194 |      | CNS              | CNS, glial cells                                           | 10090 |          |
| 19890323 | 3A1  | li36 | Breast           | Mammary gland, mammary carcinoma cells, MCF-7              | 9606  |          |
| 19901197 | 3B1  |      | Kidney           | Kidney                                                     | 10090 | GSE16623 |
| 19920188 | 0B1  |      | Bone             | Bone, Ewing's sarcoma cells, TC71                          | 9606  |          |
| 19934321 | 1C3  |      | Breast           | Mammary gland, MMTV-ErbB2 tumors                           | 10090 |          |
| 19997604 | C194 |      | CNS              | CNS, neurons, cholinergic                                  | 10090 |          |
| 19997604 | C195 |      | CNS              | CNS, neurons, GABAergic                                    | 10090 |          |
| 19997604 | C196 |      | CNS              | CNS, neurons, glutamatergic                                | 10090 |          |
| 19997604 | C197 |      | CNS              | CNS, neurons, medium spiny projection                      | 10090 |          |
| 20047966 | 3A1  | li36 | Breast           | Mammary gland, mammary carcinoma cells, MCF-7              | 9606  |          |
| 20054869 | 2A1  |      | Liver            | Liver, hepatocellular carcinoma cells, HepG2               | 9606  |          |
| 20064212 |      | 835  | Lung             | Lung, fetal                                                | 10090 | GSE18135 |
| 20079471 | 3A1  | li36 | Breast           | Mammary gland, mammary carcinoma cells, T47D               | 9606  |          |
| 20091679 | 1H4  | li23 | Gastrointestinal | Intestine                                                  | 10090 |          |
| 20091679 | 1H4  | li23 | Liver            | Liver                                                      | 10090 |          |
| 20096661 | 5A2  |      |                  | Embryonal somatic cells                                    | 10090 |          |
| 20110263 | 1C1  | li22 | Liver            | Liver, hepatocellular carcinoma cells, HepG2               | 9606  |          |
| 20111703 | 2F1  |      | Ear              | Ear, inner ear                                             | 10090 |          |
| 20159609 | 1B1  | li25 | Cardiovascular   | Blood, acute promyelocytic leukemia cells, NB4             | 9606  |          |
| 20159610 |      | li25 | Cardiovascular   | Blood, acute promyelocytic leukemia cells, NB4             | 9606  | GSE19201 |
| 20159610 | 1B1  |      | Cardiovascular   | Blood, leukemia, monocyte lymphoma cells, U937-derived PR9 | 9606  |          |
| 20171278 | 2B1  | li27 | Bone             | Bone, preosteoblasts                                       | 9606  |          |
| 20171278 | 1I1  |      | Bone             | Bone, preosteoblasts                                       | 9606  |          |
| 20176806 | 1C3  |      | Fat              | Adipose tissue, preadipocytes, 3T3-L1                      | 10090 |          |
| 20176806 | 1C3  |      | Cardiovascular   | Blood, macrophages                                         | 10090 |          |
| 20181721 | C91  | li36 | Breast           | Mammary gland, mammary carcinoma cells, MCF-7              | 9606  |          |
| 20214983 | 1I1  | li27 | Bone             | Bone, pre-osteoblastic cells, MC3T3-E1                     | 10090 |          |
| 20219888 |      | li9  | Uterus           | Uterus                                                     | 10090 | GSE19408 |
| 20219889 | C141 | li36 | Cervix           | Cervix, cervical carcinoma cells, HeLa                     | 9606  | GSE20081 |
| 20219889 | C141 | li36 | Breast           | Mammary gland, mammary carcinoma cells, MCF-7              | 9606  | GSE20081 |
| 20227041 |      | li27 | Breast           | Mammary gland, mammary carcinoma cells, SK-BR-3            | 9606  | GSE19670 |
| 20348243 | 3A1  | li36 | Breast           | Mammary gland, mammary carcinoma cells, MCF-7              | 9606  |          |
| 20348243 | 3A1  | li36 | Breast           | Mammary gland, mammary carcinoma cells, ZR-75.1            | 9606  |          |
| 20378774 | 2A1  |      | Liver            | Liver                                                      | 9606  |          |
| 20378774 | 2A1  |      | Liver            | Liver                                                      | 10090 |          |
| 20392875 |      | li36 | Breast           | Mammary gland, mammary carcinoma cells, MCF-7              | 9606  | GSE18592 |
| 20404318 | 3A1  | li36 | Bone             | Bone, osteosarcoma cells, U2OS                             | 9606  |          |
| 20404318 | 3A2  |      | Bone             | Bone, osteosarcoma cells, U2OS                             | 9606  |          |
